# Supplementary material for: Assessing the performance of docking scoring function, FEP, MM-GBSA, and QM/MM-GBSA approaches on a series of PLK1 inhibitors
Source: Royal Society of Chemistry journal article supplement (doi:10.1039/c7md00184c), 2017-01-01
Supplement: c7md00184c1.pdf [file c7md00184c1.pdf]

## Supplementary data

### Assessing the performance of docking scoring function, FEP, MM-GBSA, and QM/MM-GBSA approaches on a series of PLK1 inhibitors

Chunlan Pu, Guoyi Yan, Jianyou Shi and Rui Li.

#### Part 1. Figure S1. The computational details of each mutation and calculated results.

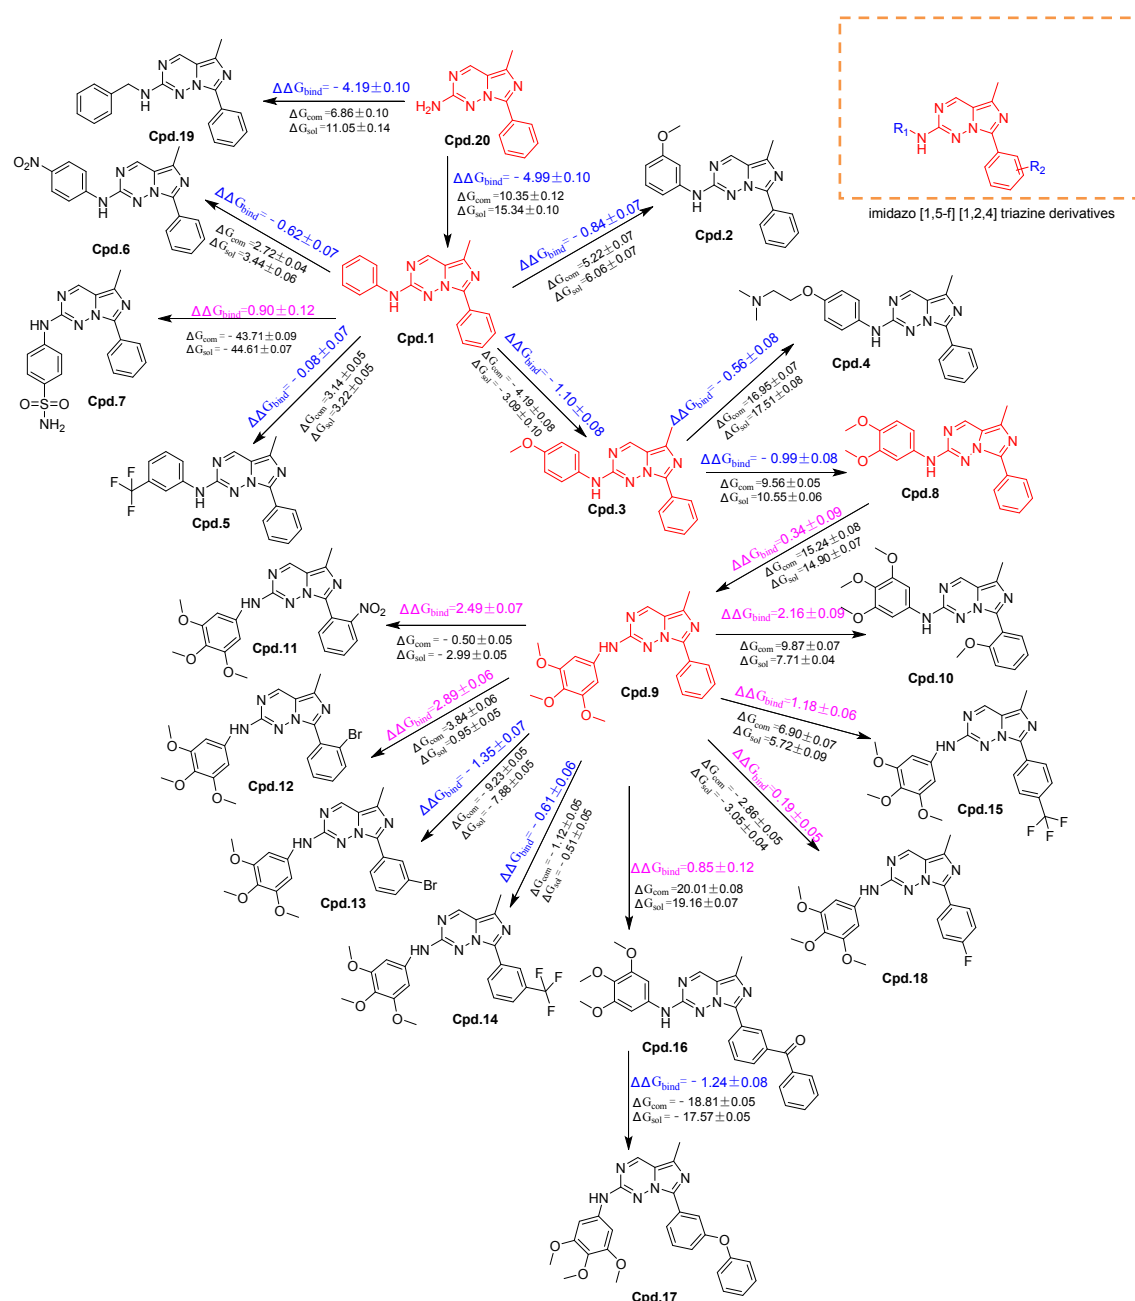

**Part 2. The sdf files of the small molecules and pdb files of the MD structures used in the assessments.**

**(1) Ligand1.mol2**

@<TRIPOS>MOLECULE

P12A

38 41 1

SMALL

USER\_CHARGES

@<TRIPOS>ATOM

|    |     |          |         |         |       |   |     |         |
|----|-----|----------|---------|---------|-------|---|-----|---------|
| 1  | N1  | -42.7518 | 12.1376 | 18.0624 | N.2   | 1 | SUB | -0.5000 |
| 2  | C2  | -44.0619 | 12.1993 | 17.6891 | C.ar  | 1 | SUB | 0.7000  |
| 3  | N3  | -44.5298 | 12.5419 | 16.4641 | N.2   | 1 | SUB | -0.2500 |
| 4  | N4  | -43.5801 | 12.9237 | 15.6247 | N.pl3 | 1 | SUB | 0.0490  |
| 5  | C5  | -42.2419 | 12.9690 | 15.8983 | C.ar  | 1 | SUB | 0.1413  |
| 6  | C6  | -41.8117 | 12.5347 | 17.1660 | C.ar  | 1 | SUB | -0.1053 |
| 7  | C7  | -43.7897 | 13.4190 | 14.3678 | C.ar  | 1 | SUB | 0.3530  |
| 8  | N8  | -42.5850 | 13.7858 | 13.8714 | N.2   | 1 | SUB | -0.5630 |
| 9  | C9  | -41.5929 | 13.5187 | 14.8327 | C.ar  | 1 | SUB | 0.1319  |
| 10 | N10 | -45.0088 | 11.9035 | 18.6841 | N.pl3 | 1 | SUB | -0.7800 |
| 11 | C11 | -40.1574 | 13.8763 | 14.6403 | C.3   | 1 | SUB | -0.0519 |
| 12 | C12 | -45.0982 | 13.6103 | 13.7441 | C.ar  | 1 | SUB | 0.0000  |
| 13 | C13 | -46.1451 | 12.6823 | 13.9611 | C.ar  | 1 | SUB | -0.1150 |
| 14 | C14 | -47.4416 | 12.9416 | 13.4814 | C.ar  | 1 | SUB | -0.1150 |
| 15 | C15 | -47.6911 | 14.1252 | 12.7675 | C.ar  | 1 | SUB | -0.1150 |
| 16 | C16 | -46.6487 | 15.0383 | 12.5151 | C.ar  | 1 | SUB | -0.1150 |
| 17 | C17 | -45.3539 | 14.7829 | 13.0054 | C.ar  | 1 | SUB | -0.1150 |
| 18 | C18 | -46.4153 | 11.8927 | 18.5790 | C.ar  | 1 | SUB | 0.2000  |
| 19 | C19 | -47.1374 | 12.7672 | 17.7245 | C.ar  | 1 | SUB | -0.1150 |
| 20 | C20 | -48.5353 | 12.6706 | 17.5962 | C.ar  | 1 | SUB | -0.1150 |
| 21 | C21 | -49.2452 | 11.7417 | 18.3730 | C.ar  | 1 | SUB | -0.1150 |
| 22 | C22 | -48.5504 | 10.9318 | 19.2911 | C.ar  | 1 | SUB | -0.1150 |
| 23 | C23 | -47.1438 | 10.9859 | 19.3779 | C.ar  | 1 | SUB | -0.1150 |
| 24 | H24 | -40.7695 | 12.5430 | 17.4521 | H     | 1 | SUB | 0.1150  |
| 25 | H25 | -44.6190 | 11.6208 | 19.5760 | H     | 1 | SUB | 0.3800  |
| 26 | H26 | -39.7942 | 14.4973 | 15.4618 | H     | 1 | SUB | 0.0600  |
| 27 | H27 | -39.5400 | 12.9772 | 14.6134 | H     | 1 | SUB | 0.0600  |
| 28 | H28 | -40.0044 | 14.4390 | 13.7182 | H     | 1 | SUB | 0.0600  |
| 29 | H29 | -45.9715 | 11.7703 | 14.5101 | H     | 1 | SUB | 0.1150  |
| 30 | H30 | -48.2430 | 12.2409 | 13.6606 | H     | 1 | SUB | 0.1150  |
| 31 | H31 | -48.6828 | 14.3253 | 12.3914 | H     | 1 | SUB | 0.1150  |
| 32 | H32 | -46.8501 | 15.9406 | 11.9569 | H     | 1 | SUB | 0.1150  |

|        |          |         |           |       |        |
|--------|----------|---------|-----------|-------|--------|
| 33 H33 | -44.5656 | 15.5016 | 12.8363 H | 1 SUB | 0.1150 |
| 34 H34 | -46.6439 | 13.5264 | 17.1400 H | 1 SUB | 0.1150 |
| 35 H35 | -49.0607 | 13.3138 | 16.9069 H | 1 SUB | 0.1150 |
| 36 H36 | -50.3179 | 11.6645 | 18.2796 H | 1 SUB | 0.1150 |
| 37 H37 | -49.0956 | 10.2255 | 19.8990 H | 1 SUB | 0.1150 |
| 38 H38 | -46.6261 | 10.3206 | 20.0535 H | 1 SUB | 0.1150 |

@<TRIPOS>BOND

|    |    |       |
|----|----|-------|
| 1  | 1  | 2 ar  |
| 2  | 1  | 6 ar  |
| 3  | 2  | 3 ar  |
| 4  | 2  | 10 1  |
| 5  | 3  | 4 ar  |
| 6  | 4  | 5 ar  |
| 7  | 4  | 7 ar  |
| 8  | 5  | 6 ar  |
| 9  | 5  | 9 ar  |
| 10 | 6  | 24 1  |
| 11 | 7  | 8 ar  |
| 12 | 7  | 12 1  |
| 13 | 8  | 9 ar  |
| 14 | 9  | 11 1  |
| 15 | 10 | 18 1  |
| 16 | 10 | 25 1  |
| 17 | 11 | 26 1  |
| 18 | 11 | 27 1  |
| 19 | 11 | 28 1  |
| 20 | 12 | 13 ar |
| 21 | 12 | 17 ar |
| 22 | 13 | 14 ar |
| 23 | 13 | 29 1  |
| 24 | 14 | 15 ar |
| 25 | 14 | 30 1  |
| 26 | 15 | 16 ar |
| 27 | 15 | 31 1  |
| 28 | 16 | 17 ar |
| 29 | 16 | 32 1  |
| 30 | 17 | 33 1  |
| 31 | 18 | 19 ar |
| 32 | 18 | 23 ar |
| 33 | 19 | 20 ar |
| 34 | 19 | 34 1  |
| 35 | 20 | 21 ar |
| 36 | 20 | 35 1  |
| 37 | 21 | 22 ar |

38 21 36 1  
39 22 23 ar  
40 22 37 1  
41 23 38 1

@<TRIPOS>SUBSTRUCTURE

1 SUB 1 GROUP 0 \*\*\*\* 0 ROOT

**(2) Ligand2.mol2**

@<TRIPOS>MOLECULE

P12B

42 45 1

SMALL

USER\_CHARGES

@<TRIPOS>ATOM

|        |     |          |         |         |        |       |   |
|--------|-----|----------|---------|---------|--------|-------|---|
| 1      | N1  | -42.7534 | 12.1407 | 18.1672 | N. 2   | 1 SUB | - |
| 0.5000 |     |          |         |         |        |       |   |
| 2      | C2  | -44.0394 | 12.2669 | 17.7481 | C. ar  | 1 SUB |   |
| 0.7000 |     |          |         |         |        |       |   |
| 3      | N3  | -44.4576 | 12.6233 | 16.5050 | N. 2   | 1 SUB | - |
| 0.2500 |     |          |         |         |        |       |   |
| 4      | N4  | -43.4583 | 12.9483 | 15.6932 | N. p13 | 1 SUB |   |
| 0.0490 |     |          |         |         |        |       |   |
| 5      | C5  | -42.1302 | 12.9421 | 16.0204 | C. ar  | 1 SUB |   |
| 0.1413 |     |          |         |         |        |       |   |
| 6      | C6  | -41.7692 | 12.5023 | 17.3047 | C. ar  | 1 SUB | - |
| 0.1053 |     |          |         |         |        |       |   |
| 7      | C7  | -43.5890 | 13.4193 | 14.4162 | C. ar  | 1 SUB |   |
| 0.3530 |     |          |         |         |        |       |   |
| 8      | N8  | -42.3499 | 13.7287 | 13.9661 | N. 2   | 1 SUB | - |
| 0.5630 |     |          |         |         |        |       |   |
| 9      | C9  | -41.4123 | 13.4439 | 14.9750 | C. ar  | 1 SUB |   |
| 0.1319 |     |          |         |         |        |       |   |
| 10     | N10 | -45.0255 | 12.0332 | 18.7133 | N. p13 | 1 SUB | - |
| 0.7800 |     |          |         |         |        |       |   |
| 11     | C11 | -39.9518 | 13.7341 | 14.8402 | C. 3   | 1 SUB | - |
| 0.0519 |     |          |         |         |        |       |   |
| 12     | C12 | -44.8555 | 13.6299 | 13.7205 | C. ar  | 1 SUB |   |
| 0.0000 |     |          |         |         |        |       |   |
| 13     | C13 | -45.0488 | 14.7919 | 12.9450 | C. ar  | 1 SUB | - |
| 0.1150 |     |          |         |         |        |       |   |
| 14     | C14 | -46.3129 | 15.0604 | 12.3863 | C. ar  | 1 SUB | - |
| 0.1150 |     |          |         |         |        |       |   |
| 15     | C15 | -47.3822 | 14.1713 | 12.6073 | C. ar  | 1 SUB | - |

|         |           |          |                |       |  |   |  |
|---------|-----------|----------|----------------|-------|--|---|--|
| 0. 1150 |           |          |                |       |  |   |  |
| 16 C16  | -47. 1932 | 12. 9976 | 13. 3544 C. ar | 1 SUB |  | - |  |
| 0. 1150 |           |          |                |       |  |   |  |
| 17 C17  | -45. 9282 | 12. 7234 | 13. 8990 C. ar | 1 SUB |  | - |  |
| 0. 1150 |           |          |                |       |  |   |  |
| 18 C18  | -46. 4011 | 12. 2221 | 18. 5287 C. ar | 1 SUB |  |   |  |
| 0. 2000 |           |          |                |       |  |   |  |
| 19 C19  | -47. 2975 | 11. 2003 | 18. 8848 C. ar | 1 SUB |  | - |  |
| 0. 1150 |           |          |                |       |  |   |  |
| 20 C20  | -48. 6695 | 11. 3404 | 18. 6033 C. ar | 1 SUB |  | - |  |
| 0. 1150 |           |          |                |       |  |   |  |
| 21 C21  | -49. 1494 | 12. 4992 | 17. 9672 C. ar | 1 SUB |  | - |  |
| 0. 1150 |           |          |                |       |  |   |  |
| 22 C22  | -48. 2778 | 13. 5607 | 17. 6575 C. ar | 1 SUB |  |   |  |
| 0. 0850 |           |          |                |       |  |   |  |
| 23 C23  | -46. 9018 | 13. 4184 | 17. 9639 C. ar | 1 SUB |  | - |  |
| 0. 1150 |           |          |                |       |  |   |  |
| 24 O24  | -48. 8362 | 14. 6913 | 17. 0998 O. 3  | 1 SUB |  | - |  |
| 0. 2850 |           |          |                |       |  |   |  |
| 25 C25  | -47. 9633 | 15. 7451 | 16. 7146 C. 3  | 1 SUB |  |   |  |
| 0. 1100 |           |          |                |       |  |   |  |
| 26 H26  | -40. 7420 | 12. 4738 | 17. 6327 H     | 1 SUB |  |   |  |
| 0. 1150 |           |          |                |       |  |   |  |
| 27 H27  | -44. 7044 | 11. 6977 | 19. 6142 H     | 1 SUB |  |   |  |
| 0. 3800 |           |          |                |       |  |   |  |
| 28 H28  | -39. 5808 | 14. 2719 | 15. 7122 H     | 1 SUB |  |   |  |
| 0. 0600 |           |          |                |       |  |   |  |
| 29 H29  | -39. 3771 | 12. 8133 | 14. 7596 H     | 1 SUB |  |   |  |
| 0. 0600 |           |          |                |       |  |   |  |
| 30 H30  | -39. 7491 | 14. 3552 | 13. 9701 H     | 1 SUB |  |   |  |
| 0. 0600 |           |          |                |       |  |   |  |
| 31 H31  | -44. 2384 | 15. 4934 | 12. 8085 H     | 1 SUB |  |   |  |
| 0. 1150 |           |          |                |       |  |   |  |
| 32 H32  | -46. 4698 | 15. 9573 | 11. 8053 H     | 1 SUB |  |   |  |
| 0. 1150 |           |          |                |       |  |   |  |
| 33 H33  | -48. 3529 | 14. 3848 | 12. 1936 H     | 1 SUB |  |   |  |
| 0. 1150 |           |          |                |       |  |   |  |
| 34 H34  | -48. 0160 | 12. 3133 | 13. 5088 H     | 1 SUB |  |   |  |
| 0. 1150 |           |          |                |       |  |   |  |
| 35 H35  | -45. 7979 | 11. 8184 | 14. 4736 H     | 1 SUB |  |   |  |
| 0. 1150 |           |          |                |       |  |   |  |
| 36 H36  | -46. 9319 | 10. 2868 | 19. 3337 H     | 1 SUB |  |   |  |
| 0. 1150 |           |          |                |       |  |   |  |
| 37 H37  | -49. 3535 | 10. 5412 | 18. 8474 H     | 1 SUB |  |   |  |

|        |          |         |           |   |     |
|--------|----------|---------|-----------|---|-----|
| 0.1150 |          |         |           |   |     |
| 38 H38 | -50.2013 | 12.5829 | 17.7371 H | 1 | SUB |
| 0.1150 |          |         |           |   |     |
| 39 H39 | -46.2017 | 14.2085 | 17.7399 H | 1 | SUB |
| 0.1150 |          |         |           |   |     |
| 40 H40 | -47.2275 | 15.4069 | 15.9824 H | 1 | SUB |
| 0.0300 |          |         |           |   |     |
| 41 H41 | -48.5443 | 16.5424 | 16.2489 H | 1 | SUB |
| 0.0300 |          |         |           |   |     |
| 42 H42 | -47.4473 | 16.1751 | 17.5742 H | 1 | SUB |

0.0300  
@<TRIPOS>BOND

|    |    |       |
|----|----|-------|
| 1  | 1  | 2 ar  |
| 2  | 1  | 6 ar  |
| 3  | 2  | 3 ar  |
| 4  | 2  | 10 1  |
| 5  | 3  | 4 ar  |
| 6  | 4  | 5 ar  |
| 7  | 4  | 7 ar  |
| 8  | 5  | 6 ar  |
| 9  | 5  | 9 ar  |
| 10 | 6  | 26 1  |
| 11 | 7  | 8 ar  |
| 12 | 7  | 12 1  |
| 13 | 8  | 9 ar  |
| 14 | 9  | 11 1  |
| 15 | 10 | 18 1  |
| 16 | 10 | 27 1  |
| 17 | 11 | 28 1  |
| 18 | 11 | 29 1  |
| 19 | 11 | 30 1  |
| 20 | 12 | 13 ar |
| 21 | 12 | 17 ar |
| 22 | 13 | 14 ar |
| 23 | 13 | 31 1  |
| 24 | 14 | 15 ar |
| 25 | 14 | 32 1  |
| 26 | 15 | 16 ar |
| 27 | 15 | 33 1  |
| 28 | 16 | 17 ar |
| 29 | 16 | 34 1  |
| 30 | 17 | 35 1  |
| 31 | 18 | 19 ar |
| 32 | 18 | 23 ar |

```

33  19  20 ar
34  19  36 1
35  20  21 ar
36  20  37 1
37  21  22 ar
38  21  38 1
39  22  23 ar
40  22  24 1
41  23  39 1
42  24  25 1
43  25  40 1
44  25  41 1
45  25  42 1

```

@<TRIPOS>SUBSTRUCTURE

```

1 SUB          1 GROUP          0      ****  0 ROOT

```

**(3) Ligand3.mol2**

@<TRIPOS>MOLECULE

P12C

```

42  45  1

```

SMALL

USER\_CHARGES

@<TRIPOS>ATOM

```

1 N1          -42.6829  12.1276  17.9673 N.2      1 SUB      -
0.5000
2 C2          -44.0153  12.1795  17.6890 C.ar      1 SUB
0.7000
3 N3          -44.5788  12.5775  16.5172 N.2      1 SUB      -
0.2500
4 N4          -43.6777  12.9988  15.6262 N.p13    1 SUB
0.0490
5 C5          -42.3199  13.0417  15.8177 C.ar      1 SUB
0.1413
6 C6          -41.8061  12.5684  17.0344 C.ar      1 SUB      -
0.1053
7 C7          -43.9461  13.5194  14.3872 C.ar      1 SUB
0.3530
8 N8          -42.7714  13.8991  13.8340 N.2      1 SUB      -
0.5630
9 C9          -41.7293  13.6143  14.7294 C.ar      1 SUB
0.1319
10 N10        -44.8359  11.8102  18.7670 N.p13    1 SUB      -
0.7800

```

|        |          |         |              |       |   |
|--------|----------|---------|--------------|-------|---|
| 11 C11 | -40.3055 | 13.9671 | 14.4519 C.3  | 1 SUB | - |
| 0.0519 |          |         |              |       |   |
| 12 C12 | -45.2634 | 13.6964 | 13.7900 C.ar | 1 SUB |   |
| 0.0000 |          |         |              |       |   |
| 13 C13 | -45.5543 | 14.8753 | 13.0720 C.ar | 1 SUB | - |
| 0.1150 |          |         |              |       |   |
| 14 C14 | -46.8482 | 15.0871 | 12.5604 C.ar | 1 SUB | - |
| 0.1150 |          |         |              |       |   |
| 15 C15 | -47.8526 | 14.1229 | 12.7693 C.ar | 1 SUB | - |
| 0.1150 |          |         |              |       |   |
| 16 C16 | -47.5632 | 12.9393 | 13.4676 C.ar | 1 SUB | - |
| 0.1150 |          |         |              |       |   |
| 17 C17 | -46.2697 | 12.7214 | 13.9696 C.ar | 1 SUB | - |
| 0.1150 |          |         |              |       |   |
| 18 C18 | -46.2189 | 11.5692 | 18.8497 C.ar | 1 SUB |   |
| 0.2000 |          |         |              |       |   |
| 19 C19 | -47.1826 | 12.0514 | 17.9315 C.ar | 1 SUB | - |
| 0.1150 |          |         |              |       |   |
| 20 C20 | -48.5497 | 11.7579 | 18.0990 C.ar | 1 SUB | - |
| 0.1150 |          |         |              |       |   |
| 21 C21 | -48.9920 | 10.9951 | 19.2062 C.ar | 1 SUB |   |
| 0.0850 |          |         |              |       |   |
| 22 C22 | -48.0343 | 10.5337 | 20.1300 C.ar | 1 SUB | - |
| 0.1150 |          |         |              |       |   |
| 23 C23 | -46.6663 | 10.8160 | 19.9544 C.ar | 1 SUB | - |
| 0.1150 |          |         |              |       |   |
| 24 O24 | -50.3111 | 10.6847 | 19.4555 O.3  | 1 SUB | - |
| 0.2850 |          |         |              |       |   |
| 25 C25 | -51.2890 | 11.1522 | 18.5378 C.3  | 1 SUB |   |
| 0.1100 |          |         |              |       |   |
| 26 H26 | -40.7479 | 12.5691 | 17.2515 H    | 1 SUB |   |
| 0.1150 |          |         |              |       |   |
| 27 H27 | -44.3301 | 11.6339 | 19.6279 H    | 1 SUB |   |
| 0.3800 |          |         |              |       |   |
| 28 H28 | -40.2070 | 14.5391 | 13.5290 H    | 1 SUB |   |
| 0.0600 |          |         |              |       |   |
| 29 H29 | -39.8916 | 14.5733 | 15.2579 H    | 1 SUB |   |
| 0.0600 |          |         |              |       |   |
| 30 H30 | -39.6934 | 13.0693 | 14.3709 H    | 1 SUB |   |
| 0.0600 |          |         |              |       |   |
| 31 H31 | -44.7915 | 15.6268 | 12.9283 H    | 1 SUB |   |
| 0.1150 |          |         |              |       |   |
| 32 H32 | -47.0751 | 15.9906 | 12.0136 H    | 1 SUB |   |
| 0.1150 |          |         |              |       |   |



|        |          |         |           |       |
|--------|----------|---------|-----------|-------|
| 33 H33 | -48.8447 | 14.2819 | 12.3754 H | 1 SUB |
| 0.1150 |          |         |           |       |
| 34 H34 | -48.3316 | 12.1945 | 13.6119 H | 1 SUB |
| 0.1150 |          |         |           |       |
| 35 H35 | -46.0612 | 11.8043 | 14.5007 H | 1 SUB |
| 0.1150 |          |         |           |       |
| 36 H36 | -46.9169 | 12.6616 | 17.0851 H | 1 SUB |
| 0.1150 |          |         |           |       |
| 37 H37 | -49.2403 | 12.1399 | 17.3619 H | 1 SUB |
| 0.1150 |          |         |           |       |
| 38 H38 | -48.3496 | 9.9547  | 20.9846 H | 1 SUB |
| 0.1150 |          |         |           |       |
| 39 H39 | -45.9564 | 10.4455 | 20.6800 H | 1 SUB |
| 0.1150 |          |         |           |       |
| 40 H40 | -51.1309 | 10.7314 | 17.5443 H | 1 SUB |
| 0.0300 |          |         |           |       |
| 41 H41 | -51.2923 | 12.2418 | 18.4738 H | 1 SUB |
| 0.0300 |          |         |           |       |
| 42 H42 | -52.2774 | 10.8389 | 18.8741 H | 1 SUB |
| 0.0300 |          |         |           |       |

@<TRIPOS>BOND

|    |    |       |
|----|----|-------|
| 1  | 1  | 2 ar  |
| 2  | 1  | 6 ar  |
| 3  | 2  | 3 ar  |
| 4  | 2  | 10 1  |
| 5  | 3  | 4 ar  |
| 6  | 4  | 5 ar  |
| 7  | 4  | 7 ar  |
| 8  | 5  | 6 ar  |
| 9  | 5  | 9 ar  |
| 10 | 6  | 26 1  |
| 11 | 7  | 8 ar  |
| 12 | 7  | 12 1  |
| 13 | 8  | 9 ar  |
| 14 | 9  | 11 1  |
| 15 | 10 | 18 1  |
| 16 | 10 | 27 1  |
| 17 | 11 | 28 1  |
| 18 | 11 | 29 1  |
| 19 | 11 | 30 1  |
| 20 | 12 | 13 ar |
| 21 | 12 | 17 ar |
| 22 | 13 | 14 ar |
| 23 | 13 | 31 1  |

24 14 15 ar  
 25 14 32 1  
 26 15 16 ar  
 27 15 33 1  
 28 16 17 ar  
 29 16 34 1  
 30 17 35 1  
 31 18 19 ar  
 32 18 23 ar  
 33 19 20 ar  
 34 19 36 1  
 35 20 21 ar  
 36 20 37 1  
 37 21 22 ar  
 38 21 24 1  
 39 22 23 ar  
 40 22 38 1  
 41 23 39 1  
 42 24 25 1  
 43 25 40 1  
 44 25 41 1  
 45 25 42 1

@<TRIPOS>SUBSTRUCTURE

1 SUB 1 GROUP 0 \*\*\*\* 0 ROOT

**(4) Ligand4.mol2**

@<TRIPOS>MOLECULE

P12D

53 56 1

SMALL

USER\_CHARGES

@<TRIPOS>ATOM

|        |          |         |         |        |       |   |
|--------|----------|---------|---------|--------|-------|---|
| 1 N1   | -42.7007 | 12.1372 | 17.9684 | N. 2   | 1 SUB | - |
| 0.5000 |          |         |         |        |       |   |
| 2 C2   | -44.0329 | 12.1811 | 17.6869 | C. ar  | 1 SUB |   |
| 0.7000 |          |         |         |        |       |   |
| 3 N3   | -44.5953 | 12.5712 | 16.5123 | N. 2   | 1 SUB | - |
| 0.2500 |          |         |         |        |       |   |
| 4 N4   | -43.6908 | 12.9904 | 15.6197 | N. p13 | 1 SUB |   |
| 0.0490 |          |         |         |        |       |   |
| 5 C5   | -42.3326 | 13.0350 | 15.8124 | C. ar  | 1 SUB |   |
| 0.1413 |          |         |         |        |       |   |
| 6 C6   | -41.8199 | 12.5690 | 17.0321 | C. ar  | 1 SUB | - |

|         |           |          |          |        |       |   |
|---------|-----------|----------|----------|--------|-------|---|
| 0. 1053 |           |          |          |        |       |   |
| 7 C7    | -43. 9568 | 13. 5089 | 14. 3791 | C. ar  | 1 SUB |   |
| 0. 3530 |           |          |          |        |       |   |
| 8 N8    | -42. 7810 | 13. 8842 | 13. 8241 | N. 2   | 1 SUB | - |
| 0. 5630 |           |          |          |        |       |   |
| 9 C9    | -41. 7411 | 13. 6062 | 14. 7241 | C. ar  | 1 SUB |   |
| 0. 1319 |           |          |          |        |       |   |
| 10 N10  | -44. 8540 | 11. 8080 | 18. 7628 | N. p13 | 1 SUB | - |
| 0. 7800 |           |          |          |        |       |   |
| 11 C11  | -40. 3184 | 13. 9647 | 14. 4519 | C. 3   | 1 SUB | - |
| 0. 0519 |           |          |          |        |       |   |
| 12 C12  | -45. 2743 | 13. 6871 | 13. 7816 | C. ar  | 1 SUB |   |
| 0. 0000 |           |          |          |        |       |   |
| 13 C13  | -45. 5604 | 14. 8653 | 13. 0618 | C. ar  | 1 SUB | - |
| 0. 1150 |           |          |          |        |       |   |
| 14 C14  | -46. 8529 | 15. 0813 | 12. 5490 | C. ar  | 1 SUB | - |
| 0. 1150 |           |          |          |        |       |   |
| 15 C15  | -47. 8593 | 14. 1235 | 12. 7673 | C. ar  | 1 SUB | - |
| 0. 1150 |           |          |          |        |       |   |
| 16 C16  | -47. 5785 | 12. 9405 | 13. 4713 | C. ar  | 1 SUB | - |
| 0. 1150 |           |          |          |        |       |   |
| 17 C17  | -46. 2846 | 12. 7173 | 13. 9674 | C. ar  | 1 SUB | - |
| 0. 1150 |           |          |          |        |       |   |
| 18 C18  | -46. 2387 | 11. 5780 | 18. 8516 | C. ar  | 1 SUB |   |
| 0. 2000 |           |          |          |        |       |   |
| 19 C19  | -47. 1991 | 12. 0916 | 17. 9499 | C. ar  | 1 SUB | - |
| 0. 1150 |           |          |          |        |       |   |
| 20 C20  | -48. 5688 | 11. 8130 | 18. 1178 | C. ar  | 1 SUB | - |
| 0. 1150 |           |          |          |        |       |   |
| 21 C21  | -49. 0200 | 11. 0320 | 19. 2099 | C. ar  | 1 SUB |   |
| 0. 0850 |           |          |          |        |       |   |
| 22 C22  | -48. 0637 | 10. 5405 | 20. 1189 | C. ar  | 1 SUB | - |
| 0. 1150 |           |          |          |        |       |   |
| 23 C23  | -46. 6928 | 10. 8117 | 19. 9442 | C. ar  | 1 SUB | - |
| 0. 1150 |           |          |          |        |       |   |
| 24 024  | -50. 3440 | 10. 7378 | 19. 4578 | 0. 3   | 1 SUB | - |
| 0. 2850 |           |          |          |        |       |   |
| 25 C25  | -51. 3178 | 11. 2054 | 18. 5304 | C. 3   | 1 SUB |   |
| 0. 1400 |           |          |          |        |       |   |
| 26 C26  | -52. 7281 | 10. 7927 | 18. 9922 | C. 3   | 1 SUB |   |
| 0. 0900 |           |          |          |        |       |   |
| 27 N27  | -52. 9278 | 9. 3411  | 19. 0388 | N. 3   | 1 SUB | - |
| 0. 6300 |           |          |          |        |       |   |
| 28 C28  | -52. 9310 | 8. 7622  | 17. 6961 | C. 3   | 1 SUB |   |

|        |     |          |         |             |       |
|--------|-----|----------|---------|-------------|-------|
| 0.0300 |     |          |         |             |       |
| 29     | C29 | -54.2174 | 9.0637  | 19.6613 C.3 | 1 SUB |
| 0.0300 |     |          |         |             |       |
| 30     | H30 | -40.7622 | 12.5757 | 17.2519 H   | 1 SUB |
| 0.1150 |     |          |         |             |       |
| 31     | H31 | -44.3454 | 11.6267 | 19.6220 H   | 1 SUB |
| 0.3800 |     |          |         |             |       |
| 32     | H32 | -39.9128 | 14.5740 | 15.2604 H   | 1 SUB |
| 0.0600 |     |          |         |             |       |
| 33     | H33 | -40.2172 | 14.5388 | 13.5293 H   | 1 SUB |
| 0.0600 |     |          |         |             |       |
| 34     | H34 | -39.7001 | 13.0725 | 14.3728 H   | 1 SUB |
| 0.0600 |     |          |         |             |       |
| 35     | H35 | -44.7936 | 15.6122 | 12.9158 H   | 1 SUB |
| 0.1150 |     |          |         |             |       |
| 36     | H36 | -47.0749 | 15.9822 | 11.9982 H   | 1 SUB |
| 0.1150 |     |          |         |             |       |
| 37     | H37 | -48.8512 | 14.2852 | 12.3749 H   | 1 SUB |
| 0.1150 |     |          |         |             |       |
| 38     | H38 | -48.3512 | 12.2006 | 13.6242 H   | 1 SUB |
| 0.1150 |     |          |         |             |       |
| 39     | H39 | -46.0796 | 11.8013 | 14.5024 H   | 1 SUB |
| 0.1150 |     |          |         |             |       |
| 40     | H40 | -46.9288 | 12.7170 | 17.1148 H   | 1 SUB |
| 0.1150 |     |          |         |             |       |
| 41     | H41 | -49.2541 | 12.2223 | 17.3917 H   | 1 SUB |
| 0.1150 |     |          |         |             |       |
| 42     | H42 | -48.3787 | 9.9449  | 20.9609 H   | 1 SUB |
| 0.1150 |     |          |         |             |       |
| 43     | H43 | -45.9833 | 10.4176 | 20.6575 H   | 1 SUB |
| 0.1150 |     |          |         |             |       |
| 44     | H44 | -51.2798 | 12.2952 | 18.4873 H   | 1 SUB |
| 0.0300 |     |          |         |             |       |
| 45     | H45 | -51.1055 | 10.8376 | 17.5274 H   | 1 SUB |
| 0.0300 |     |          |         |             |       |
| 46     | H46 | -52.8962 | 11.2094 | 19.9862 H   | 1 SUB |
| 0.0600 |     |          |         |             |       |
| 47     | H47 | -53.4741 | 11.2443 | 18.3366 H   | 1 SUB |
| 0.0600 |     |          |         |             |       |
| 48     | H48 | -53.1551 | 7.6954  | 17.7361 H   | 1 SUB |
| 0.0600 |     |          |         |             |       |
| 49     | H49 | -53.6795 | 9.2382  | 17.0551 H   | 1 SUB |
| 0.0600 |     |          |         |             |       |
| 50     | H50 | -51.9569 | 8.8656  | 17.2158 H   | 1 SUB |

0.0600  
51 H51 -54.3871 7.9869 19.7293 H 1 SUB

0.0600  
52 H52 -55.0390 9.5033 19.0900 H 1 SUB

0.0600  
53 H53 -54.2541 9.4668 20.6760 H 1 SUB

0.0600  
@<TRIPOS>BOND

1 1 2 ar  
2 1 6 ar  
3 2 3 ar  
4 2 10 1  
5 3 4 ar  
6 4 5 ar  
7 4 7 ar  
8 5 6 ar  
9 5 9 ar  
10 6 30 1  
11 7 8 ar  
12 7 12 1  
13 8 9 ar  
14 9 11 1  
15 10 18 1  
16 10 31 1  
17 11 32 1  
18 11 33 1  
19 11 34 1  
20 12 13 ar  
21 12 17 ar  
22 13 14 ar  
23 13 35 1  
24 14 15 ar  
25 14 36 1  
26 15 16 ar  
27 15 37 1  
28 16 17 ar  
29 16 38 1  
30 17 39 1  
31 18 19 ar  
32 18 23 ar  
33 19 20 ar  
34 19 40 1  
35 20 21 ar  
36 20 41 1

37 21 22 ar  
 38 21 24 1  
 39 22 23 ar  
 40 22 42 1  
 41 23 43 1  
 42 24 25 1  
 43 25 26 1  
 44 25 44 1  
 45 25 45 1  
 46 26 27 1  
 47 26 46 1  
 48 26 47 1  
 49 27 28 1  
 50 27 29 1  
 51 28 48 1  
 52 28 49 1  
 53 28 50 1  
 54 29 51 1  
 55 29 52 1  
 56 29 53 1

@<TRIPOS>SUBSTRUCTURE

1 SUB 1 GROUP 0 \*\*\*\* 0 ROOT

**(5) Ligand5.mol2**

@<TRIPOS>MOLECULE

P12E

41 44 1

SMALL

USER\_CHARGES

@<TRIPOS>ATOM

|        |          |         |         |        |       |   |
|--------|----------|---------|---------|--------|-------|---|
| 1 N1   | -42.8284 | 12.1367 | 18.1989 | N. 2   | 1 SUB | - |
| 0.5000 |          |         |         |        |       |   |
| 2 C2   | -44.1014 | 12.2102 | 17.8018 | C. ar  | 1 SUB |   |
| 0.7000 |          |         |         |        |       |   |
| 3 N3   | -44.4477 | 12.4157 | 16.5344 | N. 2   | 1 SUB | - |
| 0.2500 |          |         |         |        |       |   |
| 4 N4   | -43.4811 | 12.8813 | 15.7197 | N. p13 | 1 SUB |   |
| 0.0490 |          |         |         |        |       |   |
| 5 C5   | -42.1869 | 12.9029 | 16.0773 | C. ar  | 1 SUB |   |
| 0.1413 |          |         |         |        |       |   |
| 6 C6   | -41.8579 | 12.4665 | 17.3273 | C. ar  | 1 SUB | - |
| 0.1053 |          |         |         |        |       |   |
| 7 C7   | -43.6945 | 13.4520 | 14.5001 | C. ar  | 1 SUB |   |

|         |           |          |                 |       |   |  |
|---------|-----------|----------|-----------------|-------|---|--|
| 0. 3530 |           |          |                 |       |   |  |
| 8 N8    | -42. 4506 | 13. 7497 | 13. 9887 N. 2   | 1 SUB | - |  |
| 0. 5630 |           |          |                 |       |   |  |
| 9 C9    | -41. 5232 | 13. 4641 | 14. 9372 C. ar  | 1 SUB |   |  |
| 0. 1319 |           |          |                 |       |   |  |
| 10 N10  | -45. 0656 | 12. 0665 | 18. 7500 N. p13 | 1 SUB | - |  |
| 0. 7800 |           |          |                 |       |   |  |
| 11 C11  | -40. 0485 | 13. 7454 | 14. 7891 C. 3   | 1 SUB | - |  |
| 0. 0519 |           |          |                 |       |   |  |
| 12 C12  | -45. 0239 | 13. 6980 | 13. 8881 C. ar  | 1 SUB |   |  |
| 0. 0000 |           |          |                 |       |   |  |
| 13 C13  | -45. 2483 | 14. 8174 | 13. 1069 C. ar  | 1 SUB | - |  |
| 0. 1150 |           |          |                 |       |   |  |
| 14 C14  | -46. 4547 | 14. 9932 | 12. 4409 C. ar  | 1 SUB | - |  |
| 0. 1150 |           |          |                 |       |   |  |
| 15 C15  | -47. 4572 | 14. 0439 | 12. 5600 C. ar  | 1 SUB | - |  |
| 0. 1150 |           |          |                 |       |   |  |
| 16 C16  | -47. 2579 | 12. 9469 | 13. 3874 C. ar  | 1 SUB | - |  |
| 0. 1150 |           |          |                 |       |   |  |
| 17 C17  | -46. 0478 | 12. 7866 | 14. 0550 C. ar  | 1 SUB | - |  |
| 0. 1150 |           |          |                 |       |   |  |
| 18 C18  | -46. 3944 | 12. 1246 | 18. 4542 C. ar  | 1 SUB |   |  |
| 0. 2000 |           |          |                 |       |   |  |
| 19 C19  | -47. 2951 | 11. 1884 | 18. 9562 C. ar  | 1 SUB | - |  |
| 0. 1150 |           |          |                 |       |   |  |
| 20 C20  | -48. 6497 | 11. 3211 | 18. 7002 C. ar  | 1 SUB | - |  |
| 0. 1150 |           |          |                 |       |   |  |
| 21 C21  | -49. 1092 | 12. 3613 | 17. 9062 C. ar  | 1 SUB | - |  |
| 0. 1150 |           |          |                 |       |   |  |
| 22 C22  | -48. 2100 | 13. 2700 | 17. 3425 C. ar  | 1 SUB |   |  |
| 0. 1500 |           |          |                 |       |   |  |
| 23 C23  | -46. 8545 | 13. 1366 | 17. 6229 C. ar  | 1 SUB | - |  |
| 0. 1150 |           |          |                 |       |   |  |
| 24 C    | -48. 5766 | 14. 3290 | 16. 5104 C. 3   | 1 SUB |   |  |
| 0. 4500 |           |          |                 |       |   |  |
| 25 F    | -47. 9767 | 14. 1407 | 15. 3044 F      | 1 SUB | - |  |
| 0. 2000 |           |          |                 |       |   |  |
| 26 F    | -48. 1169 | 15. 4799 | 17. 0706 F      | 1 SUB | - |  |
| 0. 2000 |           |          |                 |       |   |  |
| 27 F    | -49. 9259 | 14. 3950 | 16. 3533 F      | 1 SUB | - |  |
| 0. 2000 |           |          |                 |       |   |  |
| 28 H26  | -40. 8212 | 12. 4131 | 17. 6267 H      | 1 SUB |   |  |
| 0. 1150 |           |          |                 |       |   |  |
| 29 H27  | -44. 7757 | 11. 8670 | 19. 6866 H      | 1 SUB |   |  |

|        |        |          |         |           |       |
|--------|--------|----------|---------|-----------|-------|
| 0.3800 |        |          |         |           |       |
|        | 30 H28 | -39.6664 | 14.2466 | 15.6798 H | 1 SUB |
| 0.0600 |        |          |         |           |       |
|        | 31 H29 | -39.5034 | 12.8116 | 14.6582 H | 1 SUB |
| 0.0600 |        |          |         |           |       |
|        | 32 H30 | -39.8693 | 14.3939 | 13.9316 H | 1 SUB |
| 0.0600 |        |          |         |           |       |
|        | 33 H31 | -44.4824 | 15.5718 | 12.9920 H | 1 SUB |
| 0.1150 |        |          |         |           |       |
|        | 34 H32 | -46.6117 | 15.8658 | 11.8253 H | 1 SUB |
| 0.1150 |        |          |         |           |       |
|        | 35 H33 | -48.3778 | 14.1667 | 12.0142 H | 1 SUB |
| 0.1150 |        |          |         |           |       |
|        | 36 H34 | -48.0394 | 12.2104 | 13.5029 H | 1 SUB |
| 0.1150 |        |          |         |           |       |
|        | 37 H35 | -45.9041 | 11.9131 | 14.6748 H | 1 SUB |
| 0.1150 |        |          |         |           |       |
|        | 38 H36 | -46.9551 | 10.3665 | 19.5692 H | 1 SUB |
| 0.1150 |        |          |         |           |       |
|        | 39 H37 | -49.3475 | 10.6133 | 19.1225 H | 1 SUB |
| 0.1150 |        |          |         |           |       |
|        | 40 H38 | -50.1715 | 12.4303 | 17.7338 H | 1 SUB |
| 0.1150 |        |          |         |           |       |
|        | 41 H39 | -46.1537 | 13.8422 | 17.2008 H | 1 SUB |
| 0.1150 |        |          |         |           |       |

@<TRIPOS>BOND

|    |    |      |
|----|----|------|
| 1  | 1  | 2 ar |
| 2  | 1  | 6 ar |
| 3  | 2  | 3 ar |
| 4  | 2  | 10 l |
| 5  | 3  | 4 ar |
| 6  | 4  | 5 ar |
| 7  | 4  | 7 ar |
| 8  | 5  | 6 ar |
| 9  | 5  | 9 ar |
| 10 | 6  | 28 l |
| 11 | 7  | 8 ar |
| 12 | 7  | 12 l |
| 13 | 8  | 9 ar |
| 14 | 9  | 11 l |
| 15 | 10 | 18 l |
| 16 | 10 | 29 l |
| 17 | 11 | 30 l |
| 18 | 11 | 31 l |



```

19  11  32  1
20  12  13  ar
21  12  17  ar
22  13  14  ar
23  13  33  1
24  14  15  ar
25  14  34  1
26  15  16  ar
27  15  35  1
28  16  17  ar
29  16  36  1
30  17  37  1
31  18  19  ar
32  18  23  ar
33  19  20  ar
34  19  38  1
35  20  21  ar
36  20  39  1
37  21  22  ar
38  21  40  1
39  22  23  ar
40  22  24  1
41  23  41  1
42  24  25  1
43  24  26  1
44  24  27  1

```

@<TRIPOS>SUBSTRUCTURE

```

1 SUB          1 GROUP          0      ****      0 ROOT

```

**(6) Ligand6.mol2**

@<TRIPOS>MOLECULE

P12F

```

40  43  1

```

SMALL

USER\_CHARGES

@<TRIPOS>ATOM

```

1 N1          -42.7516   12.1398   18.0793 N. 2          1 SUB          -
0.5000
2 C2          -44.0705   12.1633   17.7435 C. ar          1 SUB
0.7000
3 N3          -44.5843   12.5221   16.5412 N. 2          1 SUB          -
0.2500
4 N4          -43.6628   12.9242   15.6729 N. p13         1 SUB

```

|        |        |          |         |                |       |   |
|--------|--------|----------|---------|----------------|-------|---|
| 0.0490 |        |          |         |                |       |   |
|        | 5 C5   | -42.3142 | 12.9870 | 15.9107 C. ar  | 1 SUB |   |
| 0.1413 |        |          |         |                |       |   |
|        | 6 C6   | -41.8434 | 12.5625 | 17.1658 C. ar  | 1 SUB | - |
| 0.1053 |        |          |         |                |       |   |
|        | 7 C7   | -43.9020 | 13.3981 | 14.4100 C. ar  | 1 SUB |   |
| 0.3530 |        |          |         |                |       |   |
|        | 8 N8   | -42.7125 | 13.7689 | 13.8813 N. 2   | 1 SUB | - |
| 0.5630 |        |          |         |                |       |   |
|        | 9 C9   | -41.6938 | 13.5249 | 14.8204 C. ar  | 1 SUB |   |
| 0.1319 |        |          |         |                |       |   |
|        | 10 N10 | -44.9489 | 11.7785 | 18.7673 N. p13 | 1 SUB | - |
| 0.7800 |        |          |         |                |       |   |
|        | 11 C11 | -40.2639 | 13.8764 | 14.5719 C. 3   | 1 SUB | - |
| 0.0519 |        |          |         |                |       |   |
|        | 12 C12 | -45.2147 | 13.5520 | 13.7850 C. ar  | 1 SUB |   |
| 0.0000 |        |          |         |                |       |   |
|        | 13 C13 | -46.2534 | 12.6287 | 14.0492 C. ar  | 1 SUB | - |
| 0.1150 |        |          |         |                |       |   |
|        | 14 H13 | -46.0759 | 11.7475 | 14.6465 H      | 1 SUB |   |
| 0.1150 |        |          |         |                |       |   |
|        | 15 C14 | -47.5515 | 12.8588 | 13.5632 C. ar  | 1 SUB | - |
| 0.1150 |        |          |         |                |       |   |
|        | 16 C15 | -47.8083 | 13.9867 | 12.7674 C. ar  | 1 SUB | - |
| 0.1150 |        |          |         |                |       |   |
|        | 17 H15 | -48.8022 | 14.1471 | 12.3769 H      | 1 SUB |   |
| 0.1150 |        |          |         |                |       |   |
|        | 18 C16 | -46.7715 | 14.8869 | 12.4566 C. ar  | 1 SUB | - |
| 0.1150 |        |          |         |                |       |   |
|        | 19 H16 | -46.9794 | 15.7480 | 11.8395 H      | 1 SUB |   |
| 0.1150 |        |          |         |                |       |   |
|        | 20 C17 | -45.4777 | 14.6753 | 12.9732 C. ar  | 1 SUB | - |
| 0.1150 |        |          |         |                |       |   |
|        | 21 H17 | -44.6966 | 15.3902 | 12.7640 H      | 1 SUB |   |
| 0.1150 |        |          |         |                |       |   |
|        | 22 C18 | -46.3496 | 11.6536 | 18.7648 C. ar  | 1 SUB |   |
| 0.2000 |        |          |         |                |       |   |
|        | 23 C19 | -47.2040 | 12.3842 | 17.9022 C. ar  | 1 SUB | - |
| 0.1150 |        |          |         |                |       |   |
|        | 24 C20 | -48.5977 | 12.2132 | 17.9480 C. ar  | 1 SUB | - |
| 0.1150 |        |          |         |                |       |   |
|        | 25 H20 | -49.2219 | 12.7823 | 17.2725 H      | 1 SUB |   |
| 0.1150 |        |          |         |                |       |   |
|        | 26 C21 | -49.1830 | 11.3427 | 18.8885 C. ar  | 1 SUB |   |

|        |    |     |          |         |         |        |         |
|--------|----|-----|----------|---------|---------|--------|---------|
| 0.0900 |    |     |          |         |         |        |         |
|        | 27 | C22 | -48.3406 | 10.6237 | 19.7688 | C. ar  | 1 SUB - |
| 0.1150 |    |     |          |         |         |        |         |
|        | 28 | H22 | -48.7633 | 9.9496  | 20.4987 | H      | 1 SUB   |
| 0.1150 |    |     |          |         |         |        |         |
|        | 29 | C23 | -46.9393 | 10.7791 | 19.7023 | C. ar  | 1 SUB - |
| 0.1150 |    |     |          |         |         |        |         |
|        | 30 | H31 | -40.7939 | 12.5808 | 17.4221 | H      | 1 SUB   |
| 0.1150 |    |     |          |         |         |        |         |
|        | 31 | H32 | -44.4883 | 11.5334 | 19.6363 | H      | 1 SUB   |
| 0.3800 |    |     |          |         |         |        |         |
|        | 32 | H33 | -39.8610 | 14.4716 | 15.3938 | H      | 1 SUB   |
| 0.0600 |    |     |          |         |         |        |         |
|        | 33 | H34 | -39.6540 | 12.9763 | 14.4852 | H      | 1 SUB   |
| 0.0600 |    |     |          |         |         |        |         |
|        | 34 | H35 | -40.1530 | 14.4622 | 13.6594 | H      | 1 SUB   |
| 0.0600 |    |     |          |         |         |        |         |
|        | 35 | H37 | -48.3422 | 12.1568 | 13.7839 | H      | 1 SUB   |
| 0.1150 |    |     |          |         |         |        |         |
|        | 36 | H40 | -46.8275 | 13.1043 | 17.1958 | H      | 1 SUB   |
| 0.1150 |    |     |          |         |         |        |         |
|        | 37 | H41 | -46.3157 | 10.2163 | 20.3835 | H      | 1 SUB   |
| 0.1150 |    |     |          |         |         |        |         |
|        | 38 | N   | -50.6499 | 11.2349 | 18.9720 | N. p13 | 1 SUB   |
| 0.6500 |    |     |          |         |         |        |         |
|        | 39 | 0   | -51.3103 | 11.4734 | 17.9676 | 0. co2 | 1 SUB - |
| 0.3700 |    |     |          |         |         |        |         |
|        | 40 | 0   | -51.1418 | 10.9413 | 20.0573 | 0. co2 | 1 SUB - |

0.3700  
@<TRIPOS>BOND

|    |   |      |
|----|---|------|
| 1  | 1 | 2 ar |
| 2  | 1 | 6 ar |
| 3  | 2 | 3 ar |
| 4  | 2 | 10 1 |
| 5  | 3 | 4 ar |
| 6  | 4 | 5 ar |
| 7  | 4 | 7 ar |
| 8  | 5 | 6 ar |
| 9  | 5 | 9 ar |
| 10 | 6 | 30 1 |
| 11 | 7 | 8 ar |
| 12 | 7 | 12 1 |
| 13 | 8 | 9 ar |
| 14 | 9 | 11 1 |

```

15  10  22  1
16  10  31  1
17  11  32  1
18  11  33  1
19  11  34  1
20  12  13  ar
21  12  20  ar
22  13  14  1
23  13  15  ar
24  15  16  ar
25  15  35  1
26  16  17  1
27  16  18  ar
28  18  19  1
29  18  20  ar
30  20  21  1
31  22  23  ar
32  22  29  ar
33  23  24  ar
34  23  36  1
35  24  25  1
36  24  26  ar
37  26  27  ar
38  26  38  1
39  27  28  1
40  27  29  ar
41  29  37  1
42  38  39  1
43  38  40  2

```

@<TRIPOS>SUBSTRUCTURE

```

1 SUB          1 GROUP          0      ****      0 ROOT

```

**(7) Ligand7.mol2**

@<TRIPOS>MOLECULE

P12G

```

43  46  1

```

SMALL

USER\_CHARGES

@<TRIPOS>ATOM

```

1 N1          -42.7523   12.1405   18.0369 N.2          1 SUB          -
0.5000
2 C2          -44.0761   12.1942   17.7188 C.ar          1 SUB
0.7000

```

|         |        |           |          |                 |       |   |
|---------|--------|-----------|----------|-----------------|-------|---|
| 0. 2500 | 3 N3   | -44. 6033 | 12. 5466 | 16. 5181 N. 2   | 1 SUB | - |
| 0. 0490 | 4 N4   | -43. 6780 | 12. 9293 | 15. 6369 N. p13 | 1 SUB |   |
| 0. 1413 | 5 C5   | -42. 3262 | 12. 9664 | 15. 8602 C. ar  | 1 SUB |   |
| 0. 1053 | 6 C6   | -41. 8474 | 12. 5394 | 17. 1082 C. ar  | 1 SUB | - |
| 0. 3530 | 7 C7   | -43. 9178 | 13. 4177 | 14. 3801 C. ar  | 1 SUB |   |
| 0. 5630 | 8 N8   | -42. 7276 | 13. 7581 | 13. 8340 N. 2   | 1 SUB | - |
| 0. 1319 | 9 C9   | -41. 7078 | 13. 4912 | 14. 7624 C. ar  | 1 SUB |   |
| 0. 7800 | 10 N10 | -44. 9491 | 11. 8604 | 18. 7659 N. p13 | 1 SUB | - |
| 0. 0519 | 11 C11 | -40. 2759 | 13. 8131 | 14. 4963 C. 3   | 1 SUB | - |
| 0. 0000 | 12 C12 | -45. 2256 | 13. 6148 | 13. 7672 C. ar  | 1 SUB |   |
| 0. 1150 | 13 C13 | -45. 4776 | 14. 7894 | 13. 0274 C. ar  | 1 SUB | - |
| 0. 1150 | 14 C14 | -46. 7667 | 15. 0422 | 12. 5279 C. ar  | 1 SUB | - |
| 0. 1150 | 15 C15 | -47. 8081 | 14. 1253 | 12. 7670 C. ar  | 1 SUB | - |
| 0. 1150 | 16 C16 | -47. 5557 | 12. 9414 | 13. 4805 C. ar  | 1 SUB | - |
| 0. 1150 | 17 C17 | -46. 2661 | 12. 6816 | 13. 9690 C. ar  | 1 SUB | - |
| 0. 2000 | 18 C18 | -46. 3476 | 11. 7170 | 18. 7596 C. ar  | 1 SUB |   |
| 0. 1150 | 19 C19 | -47. 2059 | 12. 5068 | 17. 9563 C. ar  | 1 SUB | - |
| 0. 1150 | 20 C20 | -48. 5979 | 12. 2921 | 17. 9580 C. ar  | 1 SUB | - |
| 0. 1567 | 21 C21 | -49. 1544 | 11. 2974 | 18. 7873 C. ar  | 1 SUB |   |
| 0. 1150 | 22 C22 | -48. 3164 | 10. 5409 | 19. 6308 C. ar  | 1 SUB | - |
| 0. 1150 | 23 C23 | -46. 9212 | 10. 7545 | 19. 6180 C. ar  | 1 SUB | - |
| 0. 8327 | 24 S24 | -50. 9177 | 10. 9421 | 18. 7642 S. o2  | 1 SUB |   |

|        |     |          |         |         |       |   |     |   |
|--------|-----|----------|---------|---------|-------|---|-----|---|
| 25     | 025 | -51.5128 | 11.3396 | 20.0470 | 0.2   | 1 | SUB | - |
| 0.4680 |     |          |         |         |       |   |     |   |
| 26     | 026 | -51.0976 | 9.5685  | 18.2742 | 0.2   | 1 | SUB | - |
| 0.4680 |     |          |         |         |       |   |     |   |
| 27     | N27 | -51.5534 | 11.9908 | 17.5673 | N.p13 | 1 | SUB | - |
| 0.7678 |     |          |         |         |       |   |     |   |
| 28     | H28 | -40.7938 | 12.5402 | 17.3491 | H     | 1 | SUB |   |
| 0.1150 |     |          |         |         |       |   |     |   |
| 29     | H29 | -44.4850 | 11.6219 | 19.6341 | H     | 1 | SUB |   |
| 0.3800 |     |          |         |         |       |   |     |   |
| 30     | H30 | -39.8413 | 14.3718 | 15.3268 | H     | 1 | SUB |   |
| 0.0600 |     |          |         |         |       |   |     |   |
| 31     | H31 | -39.6896 | 12.9033 | 14.3701 | H     | 1 | SUB |   |
| 0.0600 |     |          |         |         |       |   |     |   |
| 32     | H32 | -40.1645 | 14.4238 | 13.6001 | H     | 1 | SUB |   |
| 0.0600 |     |          |         |         |       |   |     |   |
| 33     | H33 | -44.6860 | 15.5060 | 12.8640 | H     | 1 | SUB |   |
| 0.1150 |     |          |         |         |       |   |     |   |
| 34     | H34 | -46.9626 | 15.9431 | 11.9665 | H     | 1 | SUB |   |
| 0.1150 |     |          |         |         |       |   |     |   |
| 35     | H35 | -48.7958 | 14.3170 | 12.3762 | H     | 1 | SUB |   |
| 0.1150 |     |          |         |         |       |   |     |   |
| 36     | H36 | -48.3516 | 12.2310 | 13.6437 | H     | 1 | SUB |   |
| 0.1150 |     |          |         |         |       |   |     |   |
| 37     | H37 | -46.0885 | 11.7685 | 14.5193 | H     | 1 | SUB |   |
| 0.1150 |     |          |         |         |       |   |     |   |
| 38     | H38 | -46.8181 | 13.2909 | 17.3227 | H     | 1 | SUB |   |
| 0.1150 |     |          |         |         |       |   |     |   |
| 39     | H39 | -49.2181 | 12.8941 | 17.3129 | H     | 1 | SUB |   |
| 0.1150 |     |          |         |         |       |   |     |   |
| 40     | H40 | -48.7402 | 9.7779  | 20.2657 | H     | 1 | SUB |   |
| 0.1150 |     |          |         |         |       |   |     |   |
| 41     | H41 | -46.2891 | 10.1490 | 20.2509 | H     | 1 | SUB |   |
| 0.1150 |     |          |         |         |       |   |     |   |
| 42     | H42 | -52.5701 | 11.9428 | 17.5488 | H     | 1 | SUB |   |
| 0.3572 |     |          |         |         |       |   |     |   |
| 43     | H43 | -51.1856 | 11.7414 | 16.6403 | H     | 1 | SUB |   |
| 0.3572 |     |          |         |         |       |   |     |   |

@<TRIPOS>BOND

|   |   |    |    |
|---|---|----|----|
| 1 | 1 | 2  | ar |
| 2 | 1 | 6  | ar |
| 3 | 2 | 3  | ar |
| 4 | 2 | 10 | 1  |
| 5 | 3 | 4  | ar |

|    |    |    |    |
|----|----|----|----|
| 6  | 4  | 5  | ar |
| 7  | 4  | 7  | ar |
| 8  | 5  | 6  | ar |
| 9  | 5  | 9  | ar |
| 10 | 6  | 28 | 1  |
| 11 | 7  | 8  | ar |
| 12 | 7  | 12 | 1  |
| 13 | 8  | 9  | ar |
| 14 | 9  | 11 | 1  |
| 15 | 10 | 18 | 1  |
| 16 | 10 | 29 | 1  |
| 17 | 11 | 30 | 1  |
| 18 | 11 | 31 | 1  |
| 19 | 11 | 32 | 1  |
| 20 | 12 | 13 | ar |
| 21 | 12 | 17 | ar |
| 22 | 13 | 14 | ar |
| 23 | 13 | 33 | 1  |
| 24 | 14 | 15 | ar |
| 25 | 14 | 34 | 1  |
| 26 | 15 | 16 | ar |
| 27 | 15 | 35 | 1  |
| 28 | 16 | 17 | ar |
| 29 | 16 | 36 | 1  |
| 30 | 17 | 37 | 1  |
| 31 | 18 | 19 | ar |
| 32 | 18 | 23 | ar |
| 33 | 19 | 20 | ar |
| 34 | 19 | 38 | 1  |
| 35 | 20 | 21 | ar |
| 36 | 20 | 39 | 1  |
| 37 | 21 | 22 | ar |
| 38 | 21 | 24 | 1  |
| 39 | 22 | 23 | ar |
| 40 | 22 | 40 | 1  |
| 41 | 23 | 41 | 1  |
| 42 | 24 | 25 | 2  |
| 43 | 24 | 26 | 2  |
| 44 | 24 | 27 | 1  |
| 45 | 27 | 42 | 1  |
| 46 | 27 | 43 | 1  |

@<TRIPOS>SUBSTRUCTURE

1 SUB 1 GROUP

0 \*\*\*\* 0 ROOT

**(8) Ligand8.mol2**





|        |          |         |               |       |   |
|--------|----------|---------|---------------|-------|---|
| 19 C19 | -47.0943 | 12.0431 | 17.9787 C. ar | 1 SUB | - |
| 0.1150 |          |         |               |       |   |
| 20 C20 | -48.4549 | 11.7471 | 18.1753 C. ar | 1 SUB | - |
| 0.1150 |          |         |               |       |   |
| 21 C21 | -48.8718 | 10.9408 | 19.2631 C. ar | 1 SUB |   |
| 0.0850 |          |         |               |       |   |
| 22 C22 | -47.9017 | 10.4229 | 20.1520 C. ar | 1 SUB |   |
| 0.0850 |          |         |               |       |   |
| 23 C23 | -46.5339 | 10.7258 | 19.9393 C. ar | 1 SUB | - |
| 0.1150 |          |         |               |       |   |
| 24 O24 | -50.1914 | 10.6275 | 19.5135 O. 3  | 1 SUB | - |
| 0.2850 |          |         |               |       |   |
| 25 C25 | -51.1760 | 11.0870 | 18.5988 C. 3  | 1 SUB |   |
| 0.1100 |          |         |               |       |   |
| 26 O26 | -48.3518 | 9.6378  | 21.1949 O. 3  | 1 SUB | - |
| 0.2850 |          |         |               |       |   |
| 27 C27 | -47.3854 | 9.0075  | 22.0248 C. 3  | 1 SUB |   |
| 0.1100 |          |         |               |       |   |
| 28 H28 | -40.6763 | 12.6114 | 17.2383 H     | 1 SUB |   |
| 0.1150 |          |         |               |       |   |
| 29 H29 | -44.2239 | 11.6170 | 19.6245 H     | 1 SUB |   |
| 0.3800 |          |         |               |       |   |
| 30 H30 | -39.8735 | 14.6329 | 15.2262 H     | 1 SUB |   |
| 0.0600 |          |         |               |       |   |
| 31 H31 | -40.1684 | 14.5406 | 13.4961 H     | 1 SUB |   |
| 0.0600 |          |         |               |       |   |
| 32 H32 | -39.6350 | 13.1072 | 14.3867 H     | 1 SUB |   |
| 0.0600 |          |         |               |       |   |
| 33 H33 | -46.0605 | 11.8126 | 14.5728 H     | 1 SUB |   |
| 0.1150 |          |         |               |       |   |
| 34 H34 | -48.3346 | 12.2192 | 13.6953 H     | 1 SUB |   |
| 0.1150 |          |         |               |       |   |
| 35 H35 | -48.8149 | 14.2690 | 12.3836 H     | 1 SUB |   |
| 0.1150 |          |         |               |       |   |
| 36 H36 | -47.0146 | 15.9274 | 11.9486 H     | 1 SUB |   |
| 0.1150 |          |         |               |       |   |
| 37 H37 | -44.7311 | 15.5516 | 12.8533 H     | 1 SUB |   |
| 0.1150 |          |         |               |       |   |
| 38 H38 | -46.8437 | 12.6890 | 17.1531 H     | 1 SUB |   |
| 0.1150 |          |         |               |       |   |
| 39 H39 | -49.1618 | 12.1602 | 17.4720 H     | 1 SUB |   |
| 0.1150 |          |         |               |       |   |
| 40 H40 | -45.7737 | 10.3474 | 20.6053 H     | 1 SUB |   |
| 0.1150 |          |         |               |       |   |

|        |          |         |           |       |
|--------|----------|---------|-----------|-------|
| 41 H41 | -51.0024 | 10.6920 | 17.5965 H | 1 SUB |
| 0.0300 |          |         |           |       |
| 42 H42 | -51.2091 | 12.1768 | 18.5598 H | 1 SUB |
| 0.0300 |          |         |           |       |
| 43 H43 | -52.1569 | 10.7393 | 18.9217 H | 1 SUB |
| 0.0300 |          |         |           |       |
| 44 H44 | -46.7486 | 8.3314  | 21.4518 H | 1 SUB |
| 0.0300 |          |         |           |       |
| 45 H45 | -47.8921 | 8.4174  | 22.7880 H | 1 SUB |
| 0.0300 |          |         |           |       |
| 46 H46 | -46.7629 | 9.7383  | 22.5390 H | 1 SUB |
| 0.0300 |          |         |           |       |

@<TRIPOS>BOND

|    |    |       |
|----|----|-------|
| 1  | 1  | 2 ar  |
| 2  | 1  | 6 ar  |
| 3  | 2  | 3 ar  |
| 4  | 2  | 10 1  |
| 5  | 3  | 4 ar  |
| 6  | 4  | 5 ar  |
| 7  | 4  | 7 ar  |
| 8  | 5  | 6 ar  |
| 9  | 5  | 9 ar  |
| 10 | 6  | 28 1  |
| 11 | 7  | 8 ar  |
| 12 | 7  | 12 1  |
| 13 | 8  | 9 ar  |
| 14 | 9  | 11 1  |
| 15 | 10 | 18 1  |
| 16 | 10 | 29 1  |
| 17 | 11 | 30 1  |
| 18 | 11 | 31 1  |
| 19 | 11 | 32 1  |
| 20 | 12 | 13 ar |
| 21 | 12 | 17 ar |
| 22 | 13 | 14 ar |
| 23 | 13 | 33 1  |
| 24 | 14 | 15 ar |
| 25 | 14 | 34 1  |
| 26 | 15 | 16 ar |
| 27 | 15 | 35 1  |
| 28 | 16 | 17 ar |
| 29 | 16 | 36 1  |
| 30 | 17 | 37 1  |
| 31 | 18 | 19 ar |

```

32  18  23 ar
33  19  20 ar
34  19  38 1
35  20  21 ar
36  20  39 1
37  21  22 ar
38  21  24 1
39  22  23 ar
40  22  26 1
41  23  40 1
42  24  25 1
43  25  41 1
44  25  42 1
45  25  43 1
46  26  27 1
47  27  44 1
48  27  45 1
49  27  46 1

```

@<TRIPOS>SUBSTRUCTURE

```

1 SUB          1 GROUP          0      ****      0 ROOT

```

**(9) Ligand9.mol2**

@<TRIPOS>MOLECULE

P12I

```
50  53  1
```

SMALL

USER\_CHARGES

@<TRIPOS>ATOM

```

1 N1          -42.6154  12.1402  17.9671 N. 2          1 SUB          -
0.5000
2 C2          -43.9520  12.1389  17.7020 C. ar          1 SUB
0.7000
3 N3          -44.5552  12.5434  16.5517 N. 2          1 SUB          -
0.2500
4 N4          -43.6889  13.0339  15.6608 N. p13          1 SUB
0.0490
5 C5          -42.3284  13.1209  15.8318 C. ar          1 SUB
0.1413
6 C6          -41.7742  12.6388  17.0285 C. ar          1 SUB          -
0.1053
7 C7          -43.9979  13.5886  14.4449 C. ar          1 SUB
0.3530
8 N8          -42.8479  14.0135  13.8786 N. 2          1 SUB          -

```

|        |        |          |         |         |        |       |   |
|--------|--------|----------|---------|---------|--------|-------|---|
| 0.5630 |        |          |         |         |        |       |   |
|        | 9 C9   | -41.7788 | 13.7321 | 14.7410 | C. ar  | 1 SUB |   |
| 0.1319 |        |          |         |         |        |       |   |
|        | 10 N10 | -44.7289 | 11.6638 | 18.7673 | N. p13 | 1 SUB | - |
| 0.7800 |        |          |         |         |        |       |   |
|        | 11 C11 | -40.3764 | 14.1173 | 14.4130 | C. 3   | 1 SUB | - |
| 0.0519 |        |          |         |         |        |       |   |
|        | 12 C12 | -45.3206 | 13.7567 | 13.8604 | C. ar  | 1 SUB |   |
| 0.0000 |        |          |         |         |        |       |   |
|        | 13 C13 | -45.6415 | 14.9611 | 13.1983 | C. ar  | 1 SUB | - |
| 0.1150 |        |          |         |         |        |       |   |
|        | 14 C14 | -46.9285 | 15.1548 | 12.6609 | C. ar  | 1 SUB | - |
| 0.1150 |        |          |         |         |        |       |   |
|        | 15 C15 | -47.8951 | 14.1395 | 12.7788 | C. ar  | 1 SUB | - |
| 0.1150 |        |          |         |         |        |       |   |
|        | 16 C16 | -47.5761 | 12.9350 | 13.4243 | C. ar  | 1 SUB | - |
| 0.1150 |        |          |         |         |        |       |   |
|        | 17 C17 | -46.2940 | 12.7409 | 13.9671 | C. ar  | 1 SUB | - |
| 0.1150 |        |          |         |         |        |       |   |
|        | 18 C18 | -46.1102 | 11.4541 | 18.8982 | C. ar  | 1 SUB |   |
| 0.2000 |        |          |         |         |        |       |   |
|        | 19 C19 | -47.0934 | 12.1379 | 18.1495 | C. ar  | 1 SUB | - |
| 0.1150 |        |          |         |         |        |       |   |
|        | 20 C20 | -48.4718 | 11.8922 | 18.3638 | C. ar  | 1 SUB |   |
| 0.0850 |        |          |         |         |        |       |   |
|        | 21 C21 | -48.8594 | 10.9409 | 19.3346 | C. ar  | 1 SUB |   |
| 0.0850 |        |          |         |         |        |       |   |
|        | 22 C22 | -47.8937 | 10.2868 | 20.1306 | C. ar  | 1 SUB |   |
| 0.0850 |        |          |         |         |        |       |   |
|        | 23 C23 | -46.5218 | 10.5460 | 19.8920 | C. ar  | 1 SUB | - |
| 0.1150 |        |          |         |         |        |       |   |
|        | 24 O24 | -50.1866 | 10.6647 | 19.5541 | O. 3   | 1 SUB | - |
| 0.2850 |        |          |         |         |        |       |   |
|        | 25 C25 | -50.8319 | 9.9970  | 18.4768 | C. 3   | 1 SUB |   |
| 0.1100 |        |          |         |         |        |       |   |
|        | 26 O26 | -48.3486 | 9.4212  | 21.1081 | O. 3   | 1 SUB | - |
| 0.2850 |        |          |         |         |        |       |   |
|        | 27 C27 | -47.3793 | 8.7782  | 21.9245 | C. 3   | 1 SUB |   |
| 0.1100 |        |          |         |         |        |       |   |
|        | 28 O28 | -49.4756 | 12.5783 | 17.7128 | O. 3   | 1 SUB | - |
| 0.2850 |        |          |         |         |        |       |   |
|        | 29 C29 | -49.1178 | 13.5012 | 16.6955 | C. 3   | 1 SUB |   |
| 0.1100 |        |          |         |         |        |       |   |
|        | 30 H30 | -40.7119 | 12.6763 | 17.2267 | H      | 1 SUB |   |

|           |      |          |         |         |       |
|-----------|------|----------|---------|---------|-------|
| 0.1150    |      |          |         |         |       |
| 31        | H31  | -44.1944 | 11.4356 | 19.5964 | 1 SUB |
| 0.3800    |      |          |         |         |       |
| 32        | H32  | -39.7109 | 13.2542 | 14.4595 | 1 SUB |
| 0.0600    |      |          |         |         |       |
| 33        | H33  | -40.0003 | 14.8667 | 15.1116 | 1 SUB |
| 0.0600    |      |          |         |         |       |
| 34        | H34  | -40.3283 | 14.5401 | 13.4103 | 1 SUB |
| 0.0600    |      |          |         |         |       |
| 35        | H35  | -44.9029 | 15.7435 | 13.1085 | 1 SUB |
| 0.1150    |      |          |         |         |       |
| 36        | H36  | -47.1760 | 16.0783 | 12.1583 | 1 SUB |
| 0.1150    |      |          |         |         |       |
| 37        | H37  | -48.8835 | 14.2800 | 12.3700 | 1 SUB |
| 0.1150    |      |          |         |         |       |
| 38        | H38  | -48.3193 | 12.1529 | 13.5009 | 1 SUB |
| 0.1150    |      |          |         |         |       |
| 39        | H39  | -46.0632 | 11.8073 | 14.4597 | 1 SUB |
| 0.1150    |      |          |         |         |       |
| 40        | H40  | -46.7943 | 12.8849 | 17.4357 | 1 SUB |
| 0.1150    |      |          |         |         |       |
| 41        | H41  | -45.7551 | 10.0532 | 20.4686 | 1 SUB |
| 0.1150    |      |          |         |         |       |
| 42        | H42  | -51.8560 | 9.7583  | 18.7634 | 1 SUB |
| 0.0300    |      |          |         |         |       |
| 43        | H43  | -50.8814 | 10.5960 | 17.5684 | 1 SUB |
| 0.0300    |      |          |         |         |       |
| 44        | H44  | -50.3294 | 9.0566  | 18.2462 | 1 SUB |
| 0.0300    |      |          |         |         |       |
| 45        | H45  | -46.7564 | 9.4979  | 22.4567 | 1 SUB |
| 0.0300    |      |          |         |         |       |
| 46        | H46  | -47.8827 | 8.1677  | 22.6752 | 1 SUB |
| 0.0300    |      |          |         |         |       |
| 47        | H47  | -46.7419 | 8.1168  | 21.3366 | 1 SUB |
| 0.0300    |      |          |         |         |       |
| 48        | H48  | -48.5188 | 13.0170 | 15.9256 | 1 SUB |
| 0.0300    |      |          |         |         |       |
| 49        | H49  | -48.5684 | 14.3521 | 17.1008 | 1 SUB |
| 0.0300    |      |          |         |         |       |
| 50        | H50  | -50.0198 | 13.8798 | 16.2175 | 1 SUB |
| 0.0300    |      |          |         |         |       |
| @<TRIPOS> | BOND |          |         |         |       |
| 1         | 1    | 2        | ar      |         |       |
| 2         | 1    | 6        | ar      |         |       |

|    |    |       |
|----|----|-------|
| 3  | 2  | 3 ar  |
| 4  | 2  | 10 1  |
| 5  | 3  | 4 ar  |
| 6  | 4  | 5 ar  |
| 7  | 4  | 7 ar  |
| 8  | 5  | 6 ar  |
| 9  | 5  | 9 ar  |
| 10 | 6  | 30 1  |
| 11 | 7  | 8 ar  |
| 12 | 7  | 12 1  |
| 13 | 8  | 9 ar  |
| 14 | 9  | 11 1  |
| 15 | 10 | 18 1  |
| 16 | 10 | 31 1  |
| 17 | 11 | 32 1  |
| 18 | 11 | 33 1  |
| 19 | 11 | 34 1  |
| 20 | 12 | 13 ar |
| 21 | 12 | 17 ar |
| 22 | 13 | 14 ar |
| 23 | 13 | 35 1  |
| 24 | 14 | 15 ar |
| 25 | 14 | 36 1  |
| 26 | 15 | 16 ar |
| 27 | 15 | 37 1  |
| 28 | 16 | 17 ar |
| 29 | 16 | 38 1  |
| 30 | 17 | 39 1  |
| 31 | 18 | 19 ar |
| 32 | 18 | 23 ar |
| 33 | 19 | 20 ar |
| 34 | 19 | 40 1  |
| 35 | 20 | 21 ar |
| 36 | 20 | 28 1  |
| 37 | 21 | 22 ar |
| 38 | 21 | 24 1  |
| 39 | 22 | 23 ar |
| 40 | 22 | 26 1  |
| 41 | 23 | 41 1  |
| 42 | 24 | 25 1  |
| 43 | 25 | 42 1  |
| 44 | 25 | 43 1  |
| 45 | 25 | 44 1  |
| 46 | 26 | 27 1  |



|        |          |         |               |       |   |
|--------|----------|---------|---------------|-------|---|
| 14 H13 | -45.8784 | 11.8328 | 14.3919 H     | 1 SUB |   |
| 0.1150 |          |         |               |       |   |
| 15 C14 | -47.4192 | 12.9410 | 13.3897 C. ar | 1 SUB | - |
| 0.1150 |          |         |               |       |   |
| 16 C15 | -47.7621 | 14.1451 | 12.7624 C. ar | 1 SUB | - |
| 0.1150 |          |         |               |       |   |
| 17 C16 | -46.8124 | 15.1737 | 12.6368 C. ar | 1 SUB | - |
| 0.1150 |          |         |               |       |   |
| 18 H16 | -47.1217 | 16.0806 | 12.1406 H     | 1 SUB |   |
| 0.1150 |          |         |               |       |   |
| 19 C17 | -45.5020 | 15.0141 | 13.1546 C. ar | 1 SUB |   |
| 0.0850 |          |         |               |       |   |
| 20 O   | -44.5388 | 15.9994 | 13.0716 O. 3  | 1 SUB | - |
| 0.2850 |          |         |               |       |   |
| 21 C   | -44.8326 | 17.1835 | 12.3416 C. 3  | 1 SUB |   |
| 0.1100 |          |         |               |       |   |
| 22 H1  | -45.6291 | 17.7570 | 12.8185 H     | 1 SUB |   |
| 0.0300 |          |         |               |       |   |
| 23 H2  | -45.1127 | 16.9600 | 11.3096 H     | 1 SUB |   |
| 0.0300 |          |         |               |       |   |
| 24 H3  | -43.9466 | 17.8183 | 12.3086 H     | 1 SUB |   |
| 0.0300 |          |         |               |       |   |
| 25 C18 | -46.0800 | 11.5224 | 18.8592 C. ar | 1 SUB |   |
| 0.2000 |          |         |               |       |   |
| 26 C19 | -46.4880 | 10.6059 | 19.8453 C. ar | 1 SUB | - |
| 0.1150 |          |         |               |       |   |
| 27 C20 | -47.8573 | 10.3159 | 20.0558 C. ar | 1 SUB |   |
| 0.0850 |          |         |               |       |   |
| 28 C21 | -48.8261 | 10.9541 | 19.2486 C. ar | 1 SUB |   |
| 0.0850 |          |         |               |       |   |
| 29 C22 | -48.4391 | 11.9150 | 18.2813 C. ar | 1 SUB |   |
| 0.0850 |          |         |               |       |   |
| 30 C23 | -47.0607 | 12.1812 | 18.0868 C. ar | 1 SUB | - |
| 0.1150 |          |         |               |       |   |
| 31 O24 | -50.1505 | 10.6615 | 19.4695 O. 3  | 1 SUB | - |
| 0.2850 |          |         |               |       |   |
| 32 C25 | -50.8228 | 10.0627 | 18.3689 C. 3  | 1 SUB |   |
| 0.1100 |          |         |               |       |   |
| 33 O26 | -49.4390 | 12.5939 | 17.6150 O. 3  | 1 SUB | - |
| 0.2850 |          |         |               |       |   |
| 34 C27 | -49.0783 | 13.5397 | 16.6211 C. 3  | 1 SUB |   |
| 0.1100 |          |         |               |       |   |
| 35 O28 | -48.3099 | 9.4392  | 21.0215 O. 3  | 1 SUB | - |
| 0.2850 |          |         |               |       |   |



|        |          |         |             |       |
|--------|----------|---------|-------------|-------|
| 36 C29 | -47.3454 | 8.8180  | 21.8618 C.3 | 1 SUB |
| 0.1100 |          |         |             |       |
| 37 H   | -48.7574 | 14.2758 | 12.3692 H   | 1 SUB |
| 0.1150 |          |         |             |       |
| 38 H31 | -40.6438 | 12.5946 | 17.2494 H   | 1 SUB |
| 0.1150 |          |         |             |       |
| 39 H32 | -44.1788 | 11.5636 | 19.6091 H   | 1 SUB |
| 0.3800 |          |         |             |       |
| 40 H33 | -39.7863 | 14.6099 | 15.2718 H   | 1 SUB |
| 0.0600 |          |         |             |       |
| 41 H34 | -39.5940 | 13.0916 | 14.4044 H   | 1 SUB |
| 0.0600 |          |         |             |       |
| 42 H35 | -40.0937 | 14.5544 | 13.5425 H   | 1 SUB |
| 0.0600 |          |         |             |       |
| 43 H37 | -48.1477 | 12.1485 | 13.4761 H   | 1 SUB |
| 0.1150 |          |         |             |       |
| 44 H40 | -45.7202 | 10.1305 | 20.4373 H   | 1 SUB |
| 0.1150 |          |         |             |       |
| 45 H41 | -46.7560 | 12.9331 | 17.3800 H   | 1 SUB |
| 0.1150 |          |         |             |       |
| 46 H42 | -51.0256 | 10.7674 | 17.5654 H   | 1 SUB |
| 0.0300 |          |         |             |       |
| 47 H43 | -51.7843 | 9.6784  | 18.7055 H   | 1 SUB |
| 0.0300 |          |         |             |       |
| 48 H44 | -50.2565 | 9.2218  | 17.9693 H   | 1 SUB |
| 0.0300 |          |         |             |       |
| 49 H45 | -49.9793 | 13.9257 | 16.1445 H   | 1 SUB |
| 0.0300 |          |         |             |       |
| 50 H46 | -48.5371 | 14.3849 | 17.0468 H   | 1 SUB |
| 0.0300 |          |         |             |       |
| 51 H47 | -48.4724 | 13.0750 | 15.8474 H   | 1 SUB |
| 0.0300 |          |         |             |       |
| 52 H48 | -46.6781 | 8.1696  | 21.2910 H   | 1 SUB |
| 0.0300 |          |         |             |       |
| 53 H49 | -46.7555 | 9.5562  | 22.4050 H   | 1 SUB |
| 0.0300 |          |         |             |       |
| 54 H50 | -47.8514 | 8.2008  | 22.6032 H   | 1 SUB |
| 0.0300 |          |         |             |       |

@<TRIPOS>BOND

|   |   |      |
|---|---|------|
| 1 | 1 | 2 ar |
| 2 | 1 | 6 ar |
| 3 | 2 | 3 ar |
| 4 | 2 | 10 1 |
| 5 | 3 | 4 ar |

|    |    |       |
|----|----|-------|
| 6  | 4  | 5 ar  |
| 7  | 4  | 7 ar  |
| 8  | 5  | 6 ar  |
| 9  | 5  | 9 ar  |
| 10 | 6  | 38 1  |
| 11 | 7  | 8 ar  |
| 12 | 7  | 12 1  |
| 13 | 8  | 9 ar  |
| 14 | 9  | 11 1  |
| 15 | 10 | 25 1  |
| 16 | 10 | 39 1  |
| 17 | 11 | 40 1  |
| 18 | 11 | 41 1  |
| 19 | 11 | 42 1  |
| 20 | 12 | 13 ar |
| 21 | 12 | 19 ar |
| 22 | 13 | 14 1  |
| 23 | 13 | 15 ar |
| 24 | 15 | 16 ar |
| 25 | 15 | 43 1  |
| 26 | 16 | 17 ar |
| 27 | 16 | 37 1  |
| 28 | 17 | 18 1  |
| 29 | 17 | 19 ar |
| 30 | 19 | 20 1  |
| 31 | 20 | 21 1  |
| 32 | 21 | 22 1  |
| 33 | 21 | 23 1  |
| 34 | 21 | 24 1  |
| 35 | 25 | 26 ar |
| 36 | 25 | 30 ar |
| 37 | 26 | 27 ar |
| 38 | 26 | 44 1  |
| 39 | 27 | 28 ar |
| 40 | 27 | 35 1  |
| 41 | 28 | 29 ar |
| 42 | 28 | 31 1  |
| 43 | 29 | 30 ar |
| 44 | 29 | 33 1  |
| 45 | 30 | 45 1  |
| 46 | 31 | 32 1  |
| 47 | 32 | 46 1  |
| 48 | 32 | 47 1  |
| 49 | 32 | 48 1  |

50 33 34 1  
51 34 49 1  
52 34 50 1  
53 34 51 1  
54 35 36 1  
55 36 52 1  
56 36 53 1  
57 36 54 1

@<TRIPOS>SUBSTRUCTURE

1 SUB 1 GROUP 0 \*\*\*\* 0 ROOT

**(11) Ligand11.mol2**

@<TRIPOS>MOLECULE

P15B

52 55 1

SMALL

USER\_CHARGES

@<TRIPOS>ATOM

|        |     |          |         |         |        |   |     |   |
|--------|-----|----------|---------|---------|--------|---|-----|---|
| 1      | N1  | -42.5782 | 12.1411 | 17.9673 | N. 2   | 1 | SUB | - |
| 0.5000 |     |          |         |         |        |   |     |   |
| 2      | C2  | -43.9068 | 12.1905 | 17.6792 | C. ar  | 1 | SUB |   |
| 0.7000 |     |          |         |         |        |   |     |   |
| 3      | N3  | -44.4745 | 12.5494 | 16.4940 | N. 2   | 1 | SUB | - |
| 0.2500 |     |          |         |         |        |   |     |   |
| 4      | N4  | -43.5741 | 12.9374 | 15.5830 | N. p13 | 1 | SUB |   |
| 0.0490 |     |          |         |         |        |   |     |   |
| 5      | C5  | -42.2163 | 12.9922 | 15.7905 | C. ar  | 1 | SUB |   |
| 0.1413 |     |          |         |         |        |   |     |   |
| 6      | C6  | -41.7044 | 12.5639 | 17.0252 | C. ar  | 1 | SUB | - |
| 0.1053 |     |          |         |         |        |   |     |   |
| 7      | C7  | -43.8317 | 13.3991 | 14.3102 | C. ar  | 1 | SUB |   |
| 0.3530 |     |          |         |         |        |   |     |   |
| 8      | N8  | -42.6419 | 13.7527 | 13.7689 | N. 2   | 1 | SUB | - |
| 0.5630 |     |          |         |         |        |   |     |   |
| 9      | C9  | -41.6148 | 13.5361 | 14.6975 | C. ar  | 1 | SUB |   |
| 0.1319 |     |          |         |         |        |   |     |   |
| 10     | N10 | -44.7204 | 11.8528 | 18.7672 | N. p13 | 1 | SUB | - |
| 0.7800 |     |          |         |         |        |   |     |   |
| 11     | C11 | -40.1945 | 13.9283 | 14.4553 | C. 3   | 1 | SUB | - |
| 0.0519 |     |          |         |         |        |   |     |   |
| 12     | C12 | -45.1530 | 13.5466 | 13.6767 | C. ar  | 1 | SUB |   |
| 0.0000 |     |          |         |         |        |   |     |   |
| 13     | C13 | -46.1844 | 12.6359 | 14.0156 | C. ar  | 1 | SUB | - |

|         |           |          |                |       |  |   |
|---------|-----------|----------|----------------|-------|--|---|
| 0. 1150 |           |          |                |       |  |   |
| 14 H13  | -45. 9848 | 11. 7806 | 14. 6432 H     | 1 SUB |  |   |
| 0. 1150 |           |          |                |       |  |   |
| 15 C14  | -47. 5023 | 12. 8306 | 13. 5682 C. ar | 1 SUB |  | - |
| 0. 1150 |           |          |                |       |  |   |
| 16 C15  | -47. 8120 | 13. 9366 | 12. 7674 C. ar | 1 SUB |  | - |
| 0. 1150 |           |          |                |       |  |   |
| 17 C16  | -46. 7909 | 14. 8129 | 12. 3668 C. ar | 1 SUB |  | - |
| 0. 1150 |           |          |                |       |  |   |
| 18 C17  | -45. 4604 | 14. 6164 | 12. 7881 C. ar | 1 SUB |  |   |
| 0. 0900 |           |          |                |       |  |   |
| 19 C18  | -46. 0991 | 11. 6133 | 18. 8458 C. ar | 1 SUB |  |   |
| 0. 2000 |           |          |                |       |  |   |
| 20 C19  | -47. 0675 | 12. 2706 | 18. 0552 C. ar | 1 SUB |  | - |
| 0. 1150 |           |          |                |       |  |   |
| 21 C20  | -48. 4494 | 12. 0172 | 18. 2453 C. ar | 1 SUB |  |   |
| 0. 0850 |           |          |                |       |  |   |
| 22 C21  | -48. 8484 | 11. 0671 | 19. 2191 C. ar | 1 SUB |  |   |
| 0. 0850 |           |          |                |       |  |   |
| 23 C22  | -47. 8897 | 10. 4340 | 20. 0411 C. ar | 1 SUB |  |   |
| 0. 0850 |           |          |                |       |  |   |
| 24 C23  | -46. 5187 | 10. 7113 | 19. 8373 C. ar | 1 SUB |  | - |
| 0. 1150 |           |          |                |       |  |   |
| 25 024  | -50. 1753 | 10. 7950 | 19. 4508 0. 3  | 1 SUB |  | - |
| 0. 2850 |           |          |                |       |  |   |
| 26 C25  | -50. 8565 | 10. 1784 | 18. 3673 C. 3  | 1 SUB |  |   |
| 0. 1100 |           |          |                |       |  |   |
| 27 026  | -48. 3503 | 9. 5701  | 21. 0144 0. 3  | 1 SUB |  | - |
| 0. 2850 |           |          |                |       |  |   |
| 28 C27  | -47. 3928 | 8. 9392  | 21. 8539 C. 3  | 1 SUB |  |   |
| 0. 1100 |           |          |                |       |  |   |
| 29 028  | -49. 4425 | 12. 6943 | 17. 5677 0. 3  | 1 SUB |  | - |
| 0. 2850 |           |          |                |       |  |   |
| 30 C29  | -49. 0812 | 13. 7978 | 16. 7524 C. 3  | 1 SUB |  |   |
| 0. 1100 |           |          |                |       |  |   |
| 31 H    | -48. 8249 | 14. 0999 | 12. 4300 H     | 1 SUB |  |   |
| 0. 1150 |           |          |                |       |  |   |
| 32 H31  | -40. 6467 | 12. 5794 | 17. 2455 H     | 1 SUB |  |   |
| 0. 1150 |           |          |                |       |  |   |
| 33 H32  | -44. 2121 | 11. 6742 | 19. 6274 H     | 1 SUB |  |   |
| 0. 3800 |           |          |                |       |  |   |
| 34 H33  | -39. 8109 | 14. 5199 | 15. 2870 H     | 1 SUB |  |   |
| 0. 0600 |           |          |                |       |  |   |
| 35 H34  | -39. 5589 | 13. 0477 | 14. 3674 H     | 1 SUB |  |   |

|        |     |          |         |         |        |         |
|--------|-----|----------|---------|---------|--------|---------|
| 0.0600 |     |          |         |         |        |         |
| 36     | H35 | -40.0904 | 14.5344 | 13.5549 | H      | 1 SUB   |
| 0.0600 |     |          |         |         |        |         |
| 37     | H37 | -48.2824 | 12.1408 | 13.8532 | H      | 1 SUB   |
| 0.1150 |     |          |         |         |        |         |
| 38     | H38 | -47.0325 | 15.6397 | 11.7143 | H      | 1 SUB   |
| 0.1150 |     |          |         |         |        |         |
| 39     | H40 | -46.7489 | 13.0087 | 17.3391 | H      | 1 SUB   |
| 0.1150 |     |          |         |         |        |         |
| 40     | H41 | -45.7582 | 10.2393 | 20.4409 | H      | 1 SUB   |
| 0.1150 |     |          |         |         |        |         |
| 41     | H42 | -51.0710 | 10.8767 | 17.5599 | H      | 1 SUB   |
| 0.0300 |     |          |         |         |        |         |
| 42     | H43 | -51.8110 | 9.7881  | 18.7190 | H      | 1 SUB   |
| 0.0300 |     |          |         |         |        |         |
| 43     | H44 | -50.2874 | 9.3384  | 17.9676 | H      | 1 SUB   |
| 0.0300 |     |          |         |         |        |         |
| 44     | H45 | -47.9060 | 8.3438  | 22.6085 | H      | 1 SUB   |
| 0.0300 |     |          |         |         |        |         |
| 45     | H46 | -46.7477 | 8.2676  | 21.2844 | H      | 1 SUB   |
| 0.0300 |     |          |         |         |        |         |
| 46     | H47 | -46.7788 | 9.6702  | 22.3800 | H      | 1 SUB   |
| 0.0300 |     |          |         |         |        |         |
| 47     | H48 | -48.5791 | 14.5747 | 17.3304 | H      | 1 SUB   |
| 0.0300 |     |          |         |         |        |         |
| 48     | H49 | -48.4366 | 13.4907 | 15.9332 | H      | 1 SUB   |
| 0.0300 |     |          |         |         |        |         |
| 49     | H50 | -49.9799 | 14.2331 | 16.3160 | H      | 1 SUB   |
| 0.0300 |     |          |         |         |        |         |
| 50     | N   | -44.4476 | 15.5470 | 12.2785 | N. p13 | 1 SUB   |
| 0.6500 |     |          |         |         |        |         |
| 51     | 0   | -44.4221 | 16.6707 | 12.7632 | 0. co2 | 1 SUB - |
| 0.3700 |     |          |         |         |        |         |
| 52     | 0   | -43.7370 | 15.1669 | 11.3524 | 0. co2 | 1 SUB - |

@<TRIPOS>BOND

|   |   |    |    |
|---|---|----|----|
| 1 | 1 | 2  | ar |
| 2 | 1 | 6  | ar |
| 3 | 2 | 3  | ar |
| 4 | 2 | 10 | 1  |
| 5 | 3 | 4  | ar |
| 6 | 4 | 5  | ar |
| 7 | 4 | 7  | ar |
| 8 | 5 | 6  | ar |

|    |    |       |
|----|----|-------|
| 9  | 5  | 9 ar  |
| 10 | 6  | 32 1  |
| 11 | 7  | 8 ar  |
| 12 | 7  | 12 1  |
| 13 | 8  | 9 ar  |
| 14 | 9  | 11 1  |
| 15 | 10 | 19 1  |
| 16 | 10 | 33 1  |
| 17 | 11 | 34 1  |
| 18 | 11 | 35 1  |
| 19 | 11 | 36 1  |
| 20 | 12 | 13 ar |
| 21 | 12 | 18 ar |
| 22 | 13 | 14 1  |
| 23 | 13 | 15 ar |
| 24 | 15 | 16 ar |
| 25 | 15 | 37 1  |
| 26 | 16 | 17 ar |
| 27 | 16 | 31 1  |
| 28 | 17 | 18 ar |
| 29 | 17 | 38 1  |
| 30 | 18 | 50 1  |
| 31 | 19 | 20 ar |
| 32 | 19 | 24 ar |
| 33 | 20 | 21 ar |
| 34 | 20 | 39 1  |
| 35 | 21 | 22 ar |
| 36 | 21 | 29 1  |
| 37 | 22 | 23 ar |
| 38 | 22 | 25 1  |
| 39 | 23 | 24 ar |
| 40 | 23 | 27 1  |
| 41 | 24 | 40 1  |
| 42 | 25 | 26 1  |
| 43 | 26 | 41 1  |
| 44 | 26 | 42 1  |
| 45 | 26 | 43 1  |
| 46 | 27 | 28 1  |
| 47 | 28 | 44 1  |
| 48 | 28 | 45 1  |
| 49 | 28 | 46 1  |
| 50 | 29 | 30 1  |
| 51 | 30 | 47 1  |
| 52 | 30 | 48 1  |

53 30 49 1  
54 50 51 1  
55 50 52 2

@<TRIPOS>SUBSTRUCTURE

1 SUB 1 GROUP 0 \*\*\*\* 0 ROOT

**(12) Ligand12.mol2**

@<TRIPOS>MOLECULE

P15C

50 53 1

SMALL

USER\_CHARGES

@<TRIPOS>ATOM

|        |          |         |         |        |       |   |
|--------|----------|---------|---------|--------|-------|---|
| 1 N1   | -42.7105 | 12.1948 | 17.9674 | N. 2   | 1 SUB | - |
| 0.5000 |          |         |         |        |       |   |
| 2 C2   | -44.0401 | 12.2666 | 17.6847 | C. ar  | 1 SUB |   |
| 0.7000 |          |         |         |        |       |   |
| 3 N3   | -44.6117 | 12.6459 | 16.5074 | N. 2   | 1 SUB | - |
| 0.2500 |          |         |         |        |       |   |
| 4 N4   | -43.7118 | 13.0208 | 15.5927 | N. p13 | 1 SUB |   |
| 0.0490 |          |         |         |        |       |   |
| 5 C5   | -42.3510 | 13.0374 | 15.7817 | C. ar  | 1 SUB |   |
| 0.1413 |          |         |         |        |       |   |
| 6 C6   | -41.8366 | 12.5969 | 17.0135 | C. ar  | 1 SUB | - |
| 0.1053 |          |         |         |        |       |   |
| 7 C7   | -43.9747 | 13.4948 | 14.3279 | C. ar  | 1 SUB |   |
| 0.3530 |          |         |         |        |       |   |
| 8 N8   | -42.7883 | 13.7922 | 13.7559 | N. 2   | 1 SUB | - |
| 0.5630 |          |         |         |        |       |   |
| 9 C9   | -41.7549 | 13.5494 | 14.6686 | C. ar  | 1 SUB |   |
| 0.1319 |          |         |         |        |       |   |
| 10 N10 | -44.8540 | 11.9169 | 18.7673 | N. p13 | 1 SUB | - |
| 0.7800 |          |         |         |        |       |   |
| 11 C11 | -40.3390 | 13.8894 | 14.3704 | C. 3   | 1 SUB | - |
| 0.0519 |          |         |         |        |       |   |
| 12 C12 | -45.2929 | 13.6704 | 13.7134 | C. ar  | 1 SUB |   |
| 0.0000 |          |         |         |        |       |   |
| 13 C13 | -46.2887 | 12.7024 | 13.9774 | C. ar  | 1 SUB | - |
| 0.1150 |          |         |         |        |       |   |
| 14 H13 | -46.0624 | 11.8191 | 14.5553 | H      | 1 SUB |   |
| 0.1150 |          |         |         |        |       |   |
| 15 C14 | -47.6002 | 12.8743 | 13.5107 | C. ar  | 1 SUB | - |
| 0.1150 |          |         |         |        |       |   |

|        |          |         |               |       |   |
|--------|----------|---------|---------------|-------|---|
| 16 C15 | -47.9384 | 14.0114 | 12.7672 C. ar | 1 SUB | - |
| 0.1150 |          |         |               |       |   |
| 17 C16 | -46.9477 | 14.9566 | 12.4492 C. ar | 1 SUB | - |
| 0.1150 |          |         |               |       |   |
| 18 C17 | -45.6254 | 14.7933 | 12.9057 C. ar | 1 SUB |   |
| 0.2000 |          |         |               |       |   |
| 19 BR  | -44.3629 | 16.1283 | 12.3894 Br    | 1 SUB | - |
| 0.2000 |          |         |               |       |   |
| 20 C18 | -46.2341 | 11.6841 | 18.8456 C. ar | 1 SUB |   |
| 0.2000 |          |         |               |       |   |
| 21 C19 | -46.6582 | 10.8044 | 19.8554 C. ar | 1 SUB | - |
| 0.1150 |          |         |               |       |   |
| 22 C20 | -48.0306 | 10.5400 | 20.0662 C. ar | 1 SUB |   |
| 0.0850 |          |         |               |       |   |
| 23 C21 | -48.9856 | 11.1621 | 19.2310 C. ar | 1 SUB |   |
| 0.0850 |          |         |               |       |   |
| 24 C22 | -48.5833 | 12.0941 | 18.2429 C. ar | 1 SUB |   |
| 0.0850 |          |         |               |       |   |
| 25 C23 | -47.2008 | 12.3338 | 18.0446 C. ar | 1 SUB | - |
| 0.1150 |          |         |               |       |   |
| 26 024 | -50.3134 | 10.8924 | 19.4552 0.3   | 1 SUB | - |
| 0.2850 |          |         |               |       |   |
| 27 C25 | -50.9736 | 10.2517 | 18.3733 C.3   | 1 SUB |   |
| 0.1100 |          |         |               |       |   |
| 28 026 | -49.5757 | 12.7722 | 17.5673 0.3   | 1 SUB | - |
| 0.2850 |          |         |               |       |   |
| 29 C27 | -49.2052 | 13.8079 | 16.6723 C.3   | 1 SUB |   |
| 0.1100 |          |         |               |       |   |
| 30 028 | -48.4986 | 9.7135  | 21.0668 0.3   | 1 SUB | - |
| 0.2850 |          |         |               |       |   |
| 31 C29 | -47.5468 | 9.0402  | 21.8801 C.3   | 1 SUB |   |
| 0.1100 |          |         |               |       |   |
| 32 H   | -48.9486 | 14.1410 | 12.4096 H     | 1 SUB |   |
| 0.1150 |          |         |               |       |   |
| 33 H31 | -40.7751 | 12.5802 | 17.2183 H     | 1 SUB |   |
| 0.1150 |          |         |               |       |   |
| 34 H32 | -44.3424 | 11.7146 | 19.6202 H     | 1 SUB |   |
| 0.3800 |          |         |               |       |   |
| 35 H33 | -39.9370 | 14.5667 | 15.1241 H     | 1 SUB |   |
| 0.0600 |          |         |               |       |   |
| 36 H34 | -39.7173 | 12.9942 | 14.3675 H     | 1 SUB |   |
| 0.0600 |          |         |               |       |   |
| 37 H35 | -40.2586 | 14.3899 | 13.4063 H     | 1 SUB |   |
| 0.0600 |          |         |               |       |   |



|        |          |         |           |       |
|--------|----------|---------|-----------|-------|
| 38 H37 | -48.3541 | 12.1364 | 13.7324 H | 1 SUB |
| 0.1150 |          |         |           |       |
| 39 H38 | -47.2072 | 15.8153 | 11.8475 H | 1 SUB |
| 0.1150 |          |         |           |       |
| 40 H40 | -45.9001 | 10.3450 | 20.4721 H | 1 SUB |
| 0.1150 |          |         |           |       |
| 41 H41 | -46.8836 | 13.0622 | 17.3197 H | 1 SUB |
| 0.1150 |          |         |           |       |
| 42 H42 | -51.2101 | 10.9432 | 17.5655 H | 1 SUB |
| 0.0300 |          |         |           |       |
| 43 H43 | -51.9132 | 9.8276  | 18.7232 H | 1 SUB |
| 0.0300 |          |         |           |       |
| 44 H44 | -50.3731 | 9.4341  | 17.9711 H | 1 SUB |
| 0.0300 |          |         |           |       |
| 45 H45 | -50.0996 | 14.2293 | 16.2136 H | 1 SUB |
| 0.0300 |          |         |           |       |
| 46 H46 | -48.6802 | 14.6150 | 17.1861 H | 1 SUB |
| 0.0300 |          |         |           |       |
| 47 H47 | -48.5792 | 13.4274 | 15.8707 H | 1 SUB |
| 0.0300 |          |         |           |       |
| 48 H48 | -46.9294 | 8.3610  | 21.2894 H | 1 SUB |
| 0.0300 |          |         |           |       |
| 49 H49 | -46.9054 | 9.7413  | 22.4130 H | 1 SUB |
| 0.0300 |          |         |           |       |
| 50 H50 | -48.0687 | 8.4477  | 22.6306 H | 1 SUB |
| 0.0300 |          |         |           |       |

@<TRIPOS>BOND

|    |    |      |
|----|----|------|
| 1  | 1  | 2 ar |
| 2  | 1  | 6 ar |
| 3  | 2  | 3 ar |
| 4  | 2  | 10 1 |
| 5  | 3  | 4 ar |
| 6  | 4  | 5 ar |
| 7  | 4  | 7 ar |
| 8  | 5  | 6 ar |
| 9  | 5  | 9 ar |
| 10 | 6  | 33 1 |
| 11 | 7  | 8 ar |
| 12 | 7  | 12 1 |
| 13 | 8  | 9 ar |
| 14 | 9  | 11 1 |
| 15 | 10 | 20 1 |
| 16 | 10 | 34 1 |
| 17 | 11 | 35 1 |

18 11 36 1  
19 11 37 1  
20 12 13 ar  
21 12 18 ar  
22 13 14 1  
23 13 15 ar  
24 15 16 ar  
25 15 38 1  
26 16 17 ar  
27 16 32 1  
28 17 18 ar  
29 17 39 1  
30 18 19 1  
31 20 21 ar  
32 20 25 ar  
33 21 22 ar  
34 21 40 1  
35 22 23 ar  
36 22 30 1  
37 23 24 ar  
38 23 26 1  
39 24 25 ar  
40 24 28 1  
41 25 41 1  
42 26 27 1  
43 27 42 1  
44 27 43 1  
45 27 44 1  
46 28 29 1  
47 29 45 1  
48 29 46 1  
49 29 47 1  
50 30 31 1  
51 31 48 1  
52 31 49 1  
53 31 50 1

@<TRIPOS>SUBSTRUCTURE

1 SUB 1 GROUP 0 \*\*\*\* 0 ROOT

**(13) Ligand13.mol2**

@<TRIPOS>MOLECULE

P15D

50 53 1

SMALL

USER\_CHARGES

@<TRIPOS>ATOM

|        |          |         |                |       |   |
|--------|----------|---------|----------------|-------|---|
| 1 N1   | -42.7509 | 11.9025 | 17.9673 N. 2   | 1 SUB | - |
| 0.5000 |          |         |                |       |   |
| 2 C2   | -44.0840 | 12.0164 | 17.7189 C. ar  | 1 SUB |   |
| 0.7000 |          |         |                |       |   |
| 3 N3   | -44.6704 | 12.5366 | 16.6063 N. 2   | 1 SUB | - |
| 0.2500 |          |         |                |       |   |
| 4 N4   | -43.7770 | 12.9817 | 15.7214 N. p13 | 1 SUB |   |
| 0.0490 |          |         |                |       |   |
| 5 C5   | -42.4134 | 12.9472 | 15.8678 C. ar  | 1 SUB |   |
| 0.1413 |          |         |                |       |   |
| 6 C6   | -41.8844 | 12.3771 | 17.0376 C. ar  | 1 SUB | - |
| 0.1053 |          |         |                |       |   |
| 7 C7   | -44.0574 | 13.6052 | 14.5350 C. ar  | 1 SUB |   |
| 0.3530 |          |         |                |       |   |
| 8 N8   | -42.8873 | 13.9459 | 13.9566 N. 2   | 1 SUB | - |
| 0.5630 |          |         |                |       |   |
| 9 C9   | -41.8321 | 13.5406 | 14.7843 C. ar  | 1 SUB |   |
| 0.1319 |          |         |                |       |   |
| 10 N10 | -44.8724 | 11.5297 | 18.7672 N. p13 | 1 SUB | - |
| 0.7800 |          |         |                |       |   |
| 11 C11 | -40.4076 | 13.8031 | 14.4276 C. 3   | 1 SUB | - |
| 0.0519 |          |         |                |       |   |
| 12 C12 | -45.3761 | 13.9214 | 14.0100 C. ar  | 1 SUB |   |
| 0.0000 |          |         |                |       |   |
| 13 C13 | -46.3913 | 12.9409 | 13.9648 C. ar  | 1 SUB | - |
| 0.1150 |          |         |                |       |   |
| 14 H13 | -46.1890 | 11.9283 | 14.2876 H      | 1 SUB |   |
| 0.1150 |          |         |                |       |   |
| 15 C14 | -47.6752 | 13.2818 | 13.5019 C. ar  | 1 SUB | - |
| 0.1150 |          |         |                |       |   |
| 16 C15 | -47.9536 | 14.6032 | 13.1123 C. ar  | 1 SUB | - |
| 0.1150 |          |         |                |       |   |
| 17 C16 | -46.9372 | 15.5758 | 13.1257 C. ar  | 1 SUB |   |
| 0.2000 |          |         |                |       |   |
| 18 C17 | -45.6484 | 15.2350 | 13.5727 C. ar  | 1 SUB | - |
| 0.1150 |          |         |                |       |   |
| 19 H17 | -44.8734 | 15.9870 | 13.6019 H      | 1 SUB |   |
| 0.1150 |          |         |                |       |   |
| 20 C18 | -46.2585 | 11.3653 | 18.9116 C. ar  | 1 SUB |   |
| 0.2000 |          |         |                |       |   |
| 21 C19 | -46.6752 | 10.5383 | 19.9707 C. ar  | 1 SUB | - |

|        |        |          |         |               |       |  |   |
|--------|--------|----------|---------|---------------|-------|--|---|
| 0.1150 |        |          |         |               |       |  |   |
|        | 22 C20 | -48.0459 | 10.3309 | 20.2409 C. ar | 1 SUB |  |   |
| 0.0850 |        |          |         |               |       |  |   |
|        | 23 C21 | -49.0193 | 10.9412 | 19.4155 C. ar | 1 SUB |  |   |
| 0.0850 |        |          |         |               |       |  |   |
|        | 24 C22 | -48.6176 | 11.8252 | 18.3752 C. ar | 1 SUB |  |   |
| 0.0850 |        |          |         |               |       |  |   |
|        | 25 C23 | -47.2359 | 12.0145 | 18.1260 C. ar | 1 SUB |  | - |
| 0.1150 |        |          |         |               |       |  |   |
|        | 26 024 | -50.3392 | 10.6926 | 19.7290 0.3   | 1 SUB |  | - |
| 0.2850 |        |          |         |               |       |  |   |
|        | 27 C25 | -51.2628 | 10.5592 | 18.6562 C.3   | 1 SUB |  |   |
| 0.1100 |        |          |         |               |       |  |   |
|        | 28 026 | -49.5942 | 12.5356 | 17.7079 0.3   | 1 SUB |  | - |
| 0.2850 |        |          |         |               |       |  |   |
|        | 29 C27 | -49.2083 | 13.4587 | 16.7037 C.3   | 1 SUB |  |   |
| 0.1100 |        |          |         |               |       |  |   |
|        | 30 028 | -48.4950 | 9.5590  | 21.2945 0.3   | 1 SUB |  | - |
| 0.2850 |        |          |         |               |       |  |   |
|        | 31 C29 | -47.5344 | 8.9784  | 22.1665 C.3   | 1 SUB |  |   |
| 0.1100 |        |          |         |               |       |  |   |
|        | 32 H   | -48.9421 | 14.8673 | 12.7688 H     | 1 SUB |  |   |
| 0.1150 |        |          |         |               |       |  |   |
|        | 33 H31 | -40.8190 | 12.3212 | 17.2159 H     | 1 SUB |  |   |
| 0.1150 |        |          |         |               |       |  |   |
|        | 34 H32 | -44.3337 | 11.2164 | 19.5587 H     | 1 SUB |  |   |
| 0.3800 |        |          |         |               |       |  |   |
|        | 35 H33 | -39.9273 | 14.4434 | 15.1693 H     | 1 SUB |  |   |
| 0.0600 |        |          |         |               |       |  |   |
|        | 36 H34 | -39.8425 | 12.8714 | 14.3692 H     | 1 SUB |  |   |
| 0.0600 |        |          |         |               |       |  |   |
|        | 37 H35 | -40.3487 | 14.3050 | 13.4616 H     | 1 SUB |  |   |
| 0.0600 |        |          |         |               |       |  |   |
|        | 38 H37 | -48.4566 | 12.5382 | 13.4639 H     | 1 SUB |  |   |
| 0.1150 |        |          |         |               |       |  |   |
|        | 39 BR  | -47.3035 | 17.3501 | 12.5446 Br    | 1 SUB |  | - |
| 0.2000 |        |          |         |               |       |  |   |
|        | 40 H40 | -45.9165 | 10.0710 | 20.5771 H     | 1 SUB |  |   |
| 0.1150 |        |          |         |               |       |  |   |
|        | 41 H41 | -46.9296 | 12.7047 | 17.3621 H     | 1 SUB |  |   |
| 0.1150 |        |          |         |               |       |  |   |
|        | 42 H42 | -51.7166 | 11.5191 | 18.4119 H     | 1 SUB |  |   |
| 0.0300 |        |          |         |               |       |  |   |
|        | 43 H43 | -52.0675 | 9.8894  | 18.9584 H     | 1 SUB |  |   |

|        |     |          |         |         |         |
|--------|-----|----------|---------|---------|---------|
| 0.0300 |     |          |         |         |         |
| 44     | H44 | -50.8037 | 10.1390 | 17.7604 | H 1 SUB |
| 0.0300 |     |          |         |         |         |
| 45     | H45 | -50.1006 | 13.8996 | 16.2566 | H 1 SUB |
| 0.0300 |     |          |         |         |         |
| 46     | H46 | -48.5992 | 14.2696 | 17.1031 | H 1 SUB |
| 0.0300 |     |          |         |         |         |
| 47     | H47 | -48.6651 | 12.9478 | 15.9125 | H 1 SUB |
| 0.0300 |     |          |         |         |         |
| 48     | H48 | -46.9038 | 8.2556  | 21.6453 | H 1 SUB |
| 0.0300 |     |          |         |         |         |
| 49     | H49 | -46.9017 | 9.7385  | 22.6271 | H 1 SUB |
| 0.0300 |     |          |         |         |         |
| 50     | H50 | -48.0468 | 8.4523  | 22.9714 | H 1 SUB |

0.0300  
@<TRIPOS>BOND

|    |    |    |    |
|----|----|----|----|
| 1  | 1  | 2  | ar |
| 2  | 1  | 6  | ar |
| 3  | 2  | 3  | ar |
| 4  | 2  | 10 | 1  |
| 5  | 3  | 4  | ar |
| 6  | 4  | 5  | ar |
| 7  | 4  | 7  | ar |
| 8  | 5  | 6  | ar |
| 9  | 5  | 9  | ar |
| 10 | 6  | 33 | 1  |
| 11 | 7  | 8  | ar |
| 12 | 7  | 12 | 1  |
| 13 | 8  | 9  | ar |
| 14 | 9  | 11 | 1  |
| 15 | 10 | 20 | 1  |
| 16 | 10 | 34 | 1  |
| 17 | 11 | 35 | 1  |
| 18 | 11 | 36 | 1  |
| 19 | 11 | 37 | 1  |
| 20 | 12 | 13 | ar |
| 21 | 12 | 18 | ar |
| 22 | 13 | 14 | 1  |
| 23 | 13 | 15 | ar |
| 24 | 15 | 16 | ar |
| 25 | 15 | 38 | 1  |
| 26 | 16 | 17 | ar |
| 27 | 16 | 32 | 1  |
| 28 | 17 | 18 | ar |

29 17 39 1  
 30 18 19 1  
 31 20 21 ar  
 32 20 25 ar  
 33 21 22 ar  
 34 21 40 1  
 35 22 23 ar  
 36 22 30 1  
 37 23 24 ar  
 38 23 26 1  
 39 24 25 ar  
 40 24 28 1  
 41 25 41 1  
 42 26 27 1  
 43 27 42 1  
 44 27 43 1  
 45 27 44 1  
 46 28 29 1  
 47 29 45 1  
 48 29 46 1  
 49 29 47 1  
 50 30 31 1  
 51 31 48 1  
 52 31 49 1  
 53 31 50 1

@<TRIPOS>SUBSTRUCTURE

1 SUB 1 GROUP 0 \*\*\*\* 0 ROOT

**(14) Ligand14.mol2**

@<TRIPOS>MOLECULE

P15E

53 56 1

SMALL

USER\_CHARGES

@<TRIPOS>ATOM

|        |          |         |               |       |   |
|--------|----------|---------|---------------|-------|---|
| 1 N1   | -42.7438 | 12.1003 | 17.9673 N.2   | 1 SUB | - |
| 0.5000 |          |         |               |       |   |
| 2 C2   | -44.0723 | 12.1960 | 17.6926 C.ar  | 1 SUB |   |
| 0.7000 |          |         |               |       |   |
| 3 N3   | -44.6370 | 12.6464 | 16.5369 N.2   | 1 SUB | - |
| 0.2500 |          |         |               |       |   |
| 4 N4   | -43.7275 | 13.0739 | 15.6579 N.p13 | 1 SUB |   |
| 0.0490 |          |         |               |       |   |

|        |        |          |         |                |       |   |
|--------|--------|----------|---------|----------------|-------|---|
| 0.1413 | 5 C5   | -42.3683 | 13.0632 | 15.8393 C. ar  | 1 SUB |   |
| 0.1053 | 6 C6   | -41.8610 | 12.5397 | 17.0378 C. ar  | 1 SUB | - |
| 0.3530 | 7 C7   | -43.9868 | 13.6745 | 14.4545 C. ar  | 1 SUB |   |
| 0.5630 | 8 N8   | -42.8063 | 14.0255 | 13.8986 N. 2   | 1 SUB | - |
| 0.1319 | 9 C9   | -41.7665 | 13.6527 | 14.7647 C. ar  | 1 SUB |   |
| 0.7800 | 10 N10 | -44.8799 | 11.8034 | 18.7660 N. p13 | 1 SUB | - |
| 0.0519 | 11 C11 | -40.3311 | 13.9535 | 14.4790 C. 3   | 1 SUB | - |
| 0.0000 | 12 C12 | -45.3043 | 13.9752 | 13.9149 C. ar  | 1 SUB |   |
| 0.1150 | 13 C13 | -46.2880 | 12.9689 | 13.8116 C. ar  | 1 SUB | - |
| 0.1150 | 14 H13 | -46.0559 | 11.9481 | 14.0823 H      | 1 SUB |   |
| 0.1150 | 15 C14 | -47.5840 | 13.2993 | 13.3732 C. ar  | 1 SUB | - |
| 0.1150 | 16 C15 | -47.9058 | 14.6347 | 13.0694 C. ar  | 1 SUB | - |
| 0.1500 | 17 C16 | -46.9215 | 15.6441 | 13.1491 C. ar  | 1 SUB |   |
| 0.1150 | 18 C17 | -45.6182 | 15.3026 | 13.5623 C. ar  | 1 SUB | - |
| 0.1150 | 19 H17 | -44.8601 | 16.0701 | 13.6398 H      | 1 SUB |   |
| 0.2000 | 20 C18 | -46.2673 | 11.6192 | 18.8663 C. ar  | 1 SUB |   |
| 0.1150 | 21 C19 | -47.2223 | 12.2842 | 18.0616 C. ar  | 1 SUB | - |
| 0.0850 | 22 C20 | -48.6094 | 12.0778 | 18.2594 C. ar  | 1 SUB |   |
| 0.0850 | 23 C21 | -49.0349 | 11.1693 | 19.2586 C. ar  | 1 SUB |   |
| 0.0850 | 24 C22 | -48.0956 | 10.5403 | 20.1045 C. ar  | 1 SUB |   |
| 0.1150 | 25 C23 | -46.7164 | 10.7671 | 19.8900 C. ar  | 1 SUB | - |
| 0.2850 | 26 024 | -50.3694 | 10.9283 | 19.4790 0.3    | 1 SUB | - |

|        |          |         |             |       |   |
|--------|----------|---------|-------------|-------|---|
| 27 C25 | -51.0317 | 10.2767 | 18.4031 C.3 | 1 SUB |   |
| 0.1100 |          |         |             |       |   |
| 28 026 | -48.5853 | 9.7411  | 21.1188 0.3 | 1 SUB | - |
| 0.2850 |          |         |             |       |   |
| 29 C27 | -47.6506 | 9.0520  | 21.9381 C.3 | 1 SUB |   |
| 0.1100 |          |         |             |       |   |
| 30 028 | -49.5847 | 12.7684 | 17.5678 0.3 | 1 SUB | - |
| 0.2850 |          |         |             |       |   |
| 31 C29 | -49.1842 | 13.6958 | 16.5699 C.3 | 1 SUB |   |
| 0.1100 |          |         |             |       |   |
| 32 H   | -48.9130 | 14.8782 | 12.7668 H   | 1 SUB |   |
| 0.1150 |          |         |             |       |   |
| 33 H31 | -40.7999 | 12.5105 | 17.2484 H   | 1 SUB |   |
| 0.1150 |          |         |             |       |   |
| 34 H32 | -44.3529 | 11.5608 | 19.5984 H   | 1 SUB |   |
| 0.3800 |          |         |             |       |   |
| 35 H33 | -39.8828 | 14.5222 | 15.2938 H   | 1 SUB |   |
| 0.0600 |          |         |             |       |   |
| 36 H34 | -39.7596 | 13.0336 | 14.3673 H   | 1 SUB |   |
| 0.0600 |          |         |             |       |   |
| 37 H35 | -40.2211 | 14.5403 | 13.5659 H   | 1 SUB |   |
| 0.0600 |          |         |             |       |   |
| 38 H37 | -48.3437 | 12.5325 | 13.3014 H   | 1 SUB |   |
| 0.1150 |          |         |             |       |   |
| 39 C   | -47.2446 | 17.0903 | 12.8001 C.3 | 1 SUB |   |
| 0.4500 |          |         |             |       |   |
| 40 F   | -46.6970 | 17.9052 | 13.6999 F   | 1 SUB | - |
| 0.2000 |          |         |             |       |   |
| 41 F   | -48.5575 | 17.3132 | 12.7819 F   | 1 SUB | - |
| 0.2000 |          |         |             |       |   |
| 42 F   | -46.7419 | 17.3788 | 11.6003 F   | 1 SUB | - |
| 0.2000 |          |         |             |       |   |
| 43 H40 | -46.8909 | 12.9973 | 17.3279 H   | 1 SUB |   |
| 0.1150 |          |         |             |       |   |
| 44 H41 | -45.9714 | 10.2968 | 20.5152 H   | 1 SUB |   |
| 0.1150 |          |         |             |       |   |
| 45 H42 | -51.2263 | 10.9491 | 17.5667 H   | 1 SUB |   |
| 0.0300 |          |         |             |       |   |
| 46 H43 | -51.9959 | 9.9054  | 18.7472 H   | 1 SUB |   |
| 0.0300 |          |         |             |       |   |
| 47 H44 | -50.4581 | 9.4204  | 18.0404 H   | 1 SUB |   |
| 0.0300 |          |         |             |       |   |
| 48 H45 | -48.1853 | 8.4789  | 22.6944 H   | 1 SUB |   |
| 0.0300 |          |         |             |       |   |



|        |          |         |           |       |
|--------|----------|---------|-----------|-------|
| 49 H46 | -47.0498 | 8.3531  | 21.3550 H | 1 SUB |
| 0.0300 |          |         |           |       |
| 50 H47 | -46.9912 | 9.7409  | 22.4638 H | 1 SUB |
| 0.0300 |          |         |           |       |
| 51 H48 | -48.6377 | 14.5389 | 17.0000 H | 1 SUB |
| 0.0300 |          |         |           |       |
| 52 H49 | -48.5671 | 13.2109 | 15.8152 H | 1 SUB |
| 0.0300 |          |         |           |       |
| 53 H50 | -50.0672 | 14.0890 | 16.0658 H | 1 SUB |
| 0.0300 |          |         |           |       |

@<TRIPOS>BOND

|    |    |       |
|----|----|-------|
| 1  | 1  | 2 ar  |
| 2  | 1  | 6 ar  |
| 3  | 2  | 3 ar  |
| 4  | 2  | 10 1  |
| 5  | 3  | 4 ar  |
| 6  | 4  | 5 ar  |
| 7  | 4  | 7 ar  |
| 8  | 5  | 6 ar  |
| 9  | 5  | 9 ar  |
| 10 | 6  | 33 1  |
| 11 | 7  | 8 ar  |
| 12 | 7  | 12 1  |
| 13 | 8  | 9 ar  |
| 14 | 9  | 11 1  |
| 15 | 10 | 20 1  |
| 16 | 10 | 34 1  |
| 17 | 11 | 35 1  |
| 18 | 11 | 36 1  |
| 19 | 11 | 37 1  |
| 20 | 12 | 13 ar |
| 21 | 12 | 18 ar |
| 22 | 13 | 14 1  |
| 23 | 13 | 15 ar |
| 24 | 15 | 16 ar |
| 25 | 15 | 38 1  |
| 26 | 16 | 17 ar |
| 27 | 16 | 32 1  |
| 28 | 17 | 18 ar |
| 29 | 17 | 39 1  |
| 30 | 18 | 19 1  |
| 31 | 20 | 21 ar |
| 32 | 20 | 25 ar |
| 33 | 21 | 22 ar |

34 21 43 1  
35 22 23 ar  
36 22 30 1  
37 23 24 ar  
38 23 26 1  
39 24 25 ar  
40 24 28 1  
41 25 44 1  
42 26 27 1  
43 27 45 1  
44 27 46 1  
45 27 47 1  
46 28 29 1  
47 29 48 1  
48 29 49 1  
49 29 50 1  
50 30 31 1  
51 31 51 1  
52 31 52 1  
53 31 53 1  
54 39 40 1  
55 39 41 1  
56 39 42 1

@<TRIPOS>SUBSTRUCTURE

1 SUB 1 GROUP 0 \*\*\*\* 0 ROOT

**(15) Ligand15.mol2**

@<TRIPOS>MOLECULE

P15F

53 56 1 0 0

SMALL

USER\_CHARGES

@<TRIPOS>ATOM

|        |    |            |           |           |        |   |         |
|--------|----|------------|-----------|-----------|--------|---|---------|
| 1      | N1 | -43.075100 | 12.338700 | 17.478100 | N. 2   | 1 | SUBUNIT |
| 0.0000 |    |            |           |           |        |   |         |
| 2      | C2 | -44.394001 | 12.584600 | 17.519400 | C. 2   | 1 | SUBUNIT |
| 0.0000 |    |            |           |           |        |   |         |
| 3      | N3 | -45.069500 | 13.108400 | 16.495001 | N. 2   | 1 | SUBUNIT |
| 0.0000 |    |            |           |           |        |   |         |
| 4      | N4 | -44.366699 | 13.476300 | 15.406600 | N. p13 | 1 | SUBUNIT |
| 0.0000 |    |            |           |           |        |   |         |
| 5      | C5 | -43.043999 | 13.253800 | 15.304400 | C. 2   | 1 | SUBUNIT |

|        |            |           |                 |   |         |
|--------|------------|-----------|-----------------|---|---------|
| 0.0000 |            |           |                 |   |         |
| 6 C6   | -42.398602 | 12.666300 | 16.359100 C.2   | 1 | SUBUNIT |
| 0.0000 |            |           |                 |   |         |
| 7 C7   | -44.884899 | 14.116300 | 14.313300 C.2   | 1 | SUBUNIT |
| 0.0000 |            |           |                 |   |         |
| 8 N8   | -43.843300 | 14.254600 | 13.425200 N.2   | 1 | SUBUNIT |
| 0.0000 |            |           |                 |   |         |
| 9 C9   | -42.718601 | 13.763200 | 14.001100 C.2   | 1 | SUBUNIT |
| 0.0000 |            |           |                 |   |         |
| 10 N10 | -45.035801 | 12.281900 | 18.686399 N.p13 | 1 | SUBUNIT |
| 0.0000 |            |           |                 |   |         |
| 11 C11 | -41.367298 | 13.784500 | 13.329100 C.3   | 1 | SUBUNIT |
| 0.0000 |            |           |                 |   |         |
| 12 C12 | -46.285801 | 14.580600 | 14.125100 C.2   | 1 | SUBUNIT |
| 0.0000 |            |           |                 |   |         |
| 13 C13 | -47.159901 | 13.890000 | 13.310500 C.2   | 1 | SUBUNIT |
| 0.0000 |            |           |                 |   |         |
| 14 C14 | -48.474201 | 14.320200 | 13.145900 C.2   | 1 | SUBUNIT |
| 0.0000 |            |           |                 |   |         |
| 15 C15 | -48.948200 | 15.455500 | 13.804100 C.2   | 1 | SUBUNIT |
| 0.0000 |            |           |                 |   |         |
| 16 C16 | -48.058300 | 16.153000 | 14.613100 C.2   | 1 | SUBUNIT |
| 0.0000 |            |           |                 |   |         |
| 17 C17 | -46.748402 | 15.716000 | 14.761400 C.2   | 1 | SUBUNIT |
| 0.0000 |            |           |                 |   |         |
| 18 C18 | -46.348202 | 11.900900 | 18.796000 C.2   | 1 | SUBUNIT |
| 0.0000 |            |           |                 |   |         |
| 19 C19 | -47.396900 | 12.533300 | 18.125401 C.2   | 1 | SUBUNIT |
| 0.0000 |            |           |                 |   |         |
| 20 C20 | -48.715401 | 12.121600 | 18.308399 C.2   | 1 | SUBUNIT |
| 0.0000 |            |           |                 |   |         |
| 21 C21 | -48.986198 | 11.092900 | 19.206600 C.2   | 1 | SUBUNIT |
| 0.0000 |            |           |                 |   |         |
| 22 C22 | -47.962898 | 10.493900 | 19.933701 C.2   | 1 | SUBUNIT |
| 0.0000 |            |           |                 |   |         |
| 23 C23 | -46.643700 | 10.893600 | 19.707899 C.2   | 1 | SUBUNIT |
| 0.0000 |            |           |                 |   |         |
| 24 O24 | -50.293598 | 10.692500 | 19.444599 O.3   | 1 | SUBUNIT |
| 0.0000 |            |           |                 |   |         |
| 25 C25 | -50.802502 | 9.932800  | 18.365000 C.3   | 1 | SUBUNIT |
| 0.0000 |            |           |                 |   |         |
| 26 O26 | -48.346699 | 9.511800  | 20.850500 O.3   | 1 | SUBUNIT |
| 0.0000 |            |           |                 |   |         |
| 27 C27 | -47.319000 | 9.002000  | 21.679300 C.3   | 1 | SUBUNIT |

|        |        |            |           |           |     |           |
|--------|--------|------------|-----------|-----------|-----|-----------|
| 0.0000 |        |            |           |           |     |           |
|        | 28 028 | -49.811501 | 12.729800 | 17.693800 | 0.3 | 1 SUBUNIT |
| 0.0000 |        |            |           |           |     |           |
|        | 29 C29 | -49.526600 | 13.671900 | 16.677999 | C.3 | 1 SUBUNIT |
| 0.0000 |        |            |           |           |     |           |
|        | 30 C30 | -50.366600 | 15.949800 | 13.637200 | C.3 | 1 SUBUNIT |
| 0.0000 |        |            |           |           |     |           |
|        | 31 F31 | -50.342300 | 16.922501 | 12.744300 | F   | 1 SUBUNIT |
| 0.0000 |        |            |           |           |     |           |
|        | 32 F32 | -51.150700 | 14.968600 | 13.230800 | F   | 1 SUBUNIT |
| 0.0000 |        |            |           |           |     |           |
|        | 33 F33 | -50.791401 | 16.407700 | 14.804200 | F   | 1 SUBUNIT |
| 0.0000 |        |            |           |           |     |           |
|        | 34 H34 | -41.337299 | 12.470800 | 16.297800 | H   | 1 SUBUNIT |
| 0.0000 |        |            |           |           |     |           |
|        | 35 H35 | -44.457401 | 12.179100 | 19.496201 | H   | 1 SUBUNIT |
| 0.0000 |        |            |           |           |     |           |
|        | 36 H36 | -41.470699 | 13.602200 | 12.259600 | H   | 1 SUBUNIT |
| 0.0000 |        |            |           |           |     |           |
|        | 37 H37 | -40.887798 | 14.751200 | 13.476800 | H   | 1 SUBUNIT |
| 0.0000 |        |            |           |           |     |           |
|        | 38 H38 | -40.725300 | 13.014300 | 13.755700 | H   | 1 SUBUNIT |
| 0.0000 |        |            |           |           |     |           |
|        | 39 H39 | -46.832100 | 13.001600 | 12.787600 | H   | 1 SUBUNIT |
| 0.0000 |        |            |           |           |     |           |
|        | 40 H40 | -49.116699 | 13.756500 | 12.492800 | H   | 1 SUBUNIT |
| 0.0000 |        |            |           |           |     |           |
|        | 41 H41 | -48.370602 | 17.050400 | 15.127300 | H   | 1 SUBUNIT |
| 0.0000 |        |            |           |           |     |           |
|        | 42 H42 | -46.107700 | 16.311600 | 15.386800 | H   | 1 SUBUNIT |
| 0.0000 |        |            |           |           |     |           |
|        | 43 H43 | -47.205898 | 13.382700 | 17.493799 | H   | 1 SUBUNIT |
| 0.0000 |        |            |           |           |     |           |
|        | 44 H44 | -45.824402 | 10.438900 | 20.243999 | H   | 1 SUBUNIT |
| 0.0000 |        |            |           |           |     |           |
|        | 45 H45 | -51.804501 | 9.578900  | 18.603800 | H   | 1 SUBUNIT |
| 0.0000 |        |            |           |           |     |           |
|        | 46 H46 | -50.174400 | 9.061500  | 18.177000 | H   | 1 SUBUNIT |
| 0.0000 |        |            |           |           |     |           |
|        | 47 H47 | -50.874001 | 10.525800 | 17.454399 | H   | 1 SUBUNIT |
| 0.0000 |        |            |           |           |     |           |
|        | 48 H48 | -46.841599 | 9.804100  | 22.240700 | H   | 1 SUBUNIT |
| 0.0000 |        |            |           |           |     |           |
|        | 49 H49 | -47.741699 | 8.307000  | 22.405100 | H   | 1 SUBUNIT |

|        |     |            |           |             |           |
|--------|-----|------------|-----------|-------------|-----------|
| 0.0000 |     |            |           |             |           |
| 50     | H50 | -46.576199 | 8.459600  | 21.093300 H | 1 SUBUNIT |
| 0.0000 |     |            |           |             |           |
| 51     | H51 | -48.885399 | 13.237900 | 15.909500 H | 1 SUBUNIT |
| 0.0000 |     |            |           |             |           |
| 52     | H52 | -49.056900 | 14.565700 | 17.090000 H | 1 SUBUNIT |
| 0.0000 |     |            |           |             |           |
| 53     | H53 | -50.456799 | 13.974300 | 16.198601 H | 1 SUBUNIT |

0.0000  
@<TRIPOS>BOND

|    |    |      |
|----|----|------|
| 1  | 1  | 2 1  |
| 2  | 1  | 6 2  |
| 3  | 2  | 3 2  |
| 4  | 2  | 10 1 |
| 5  | 3  | 4 1  |
| 6  | 4  | 5 1  |
| 7  | 4  | 7 1  |
| 8  | 5  | 6 1  |
| 9  | 5  | 9 2  |
| 10 | 6  | 34 1 |
| 11 | 7  | 8 2  |
| 12 | 7  | 12 1 |
| 13 | 8  | 9 1  |
| 14 | 9  | 11 1 |
| 15 | 10 | 18 1 |
| 16 | 10 | 35 1 |
| 17 | 11 | 36 1 |
| 18 | 11 | 37 1 |
| 19 | 11 | 38 1 |
| 20 | 12 | 13 2 |
| 21 | 12 | 17 1 |
| 22 | 13 | 14 1 |
| 23 | 13 | 39 1 |
| 24 | 14 | 15 2 |
| 25 | 14 | 40 1 |
| 26 | 15 | 16 1 |
| 27 | 15 | 30 1 |
| 28 | 16 | 17 2 |
| 29 | 16 | 41 1 |
| 30 | 17 | 42 1 |
| 31 | 18 | 19 2 |
| 32 | 18 | 23 1 |
| 33 | 19 | 20 1 |
| 34 | 19 | 43 1 |

35 20 21 2  
36 20 28 1  
37 21 22 1  
38 21 24 1  
39 22 23 2  
40 22 26 1  
41 23 44 1  
42 24 25 1  
43 25 45 1  
44 25 46 1  
45 25 47 1  
46 26 27 1  
47 27 48 1  
48 27 49 1  
49 27 50 1  
50 28 29 1  
51 29 51 1  
52 29 52 1  
53 29 53 1  
54 30 31 1  
55 30 32 1  
56 30 33 1

@<TRIPOS>SUBSTRUCTURE

1 SUB 1 GROUP 0 \*\*\*\* 0 ROOT

**(16) Ligand16.mol2**

@<TRIPOS>MOLECULE

P15G

62 66 1

SMALL

USER\_CHARGES

@<TRIPOS>ATOM

|        |          |         |                |       |   |
|--------|----------|---------|----------------|-------|---|
| 1 N1   | -42.8050 | 12.0856 | 17.9695 N. 2   | 1 SUB | - |
| 0.5000 |          |         |                |       |   |
| 2 C2   | -44.1800 | 12.1061 | 17.7980 C. ar  | 1 SUB |   |
| 0.7000 |          |         |                |       |   |
| 3 N3   | -44.7736 | 12.4311 | 16.6836 N. 2   | 1 SUB | - |
| 0.2500 |          |         |                |       |   |
| 4 N4   | -43.9623 | 12.8079 | 15.6765 N. p13 | 1 SUB |   |
| 0.0490 |          |         |                |       |   |
| 5 C5   | -42.6123 | 12.8335 | 15.7716 C. ar  | 1 SUB |   |
| 0.1413 |          |         |                |       |   |
| 6 C6   | -42.0392 | 12.4513 | 16.9933 C. ar  | 1 SUB | - |

|         |           |          |                 |       |  |   |
|---------|-----------|----------|-----------------|-------|--|---|
| 0. 1053 |           |          |                 |       |  |   |
| 7 C7    | -44. 2876 | 13. 2617 | 14. 4106 C. ar  | 1 SUB |  |   |
| 0. 3530 |           |          |                 |       |  |   |
| 8 N8    | -43. 1835 | 13. 5296 | 13. 7252 N. 2   | 1 SUB |  | - |
| 0. 5630 |           |          |                 |       |  |   |
| 9 C9    | -42. 1348 | 13. 3043 | 14. 5788 C. ar  | 1 SUB |  |   |
| 0. 1319 |           |          |                 |       |  |   |
| 10 N10  | -44. 8802 | 11. 7200 | 18. 9126 N. p13 | 1 SUB |  | - |
| 0. 7800 |           |          |                 |       |  |   |
| 11 C11  | -40. 7487 | 13. 6114 | 14. 1839 C. 3   | 1 SUB |  | - |
| 0. 0519 |           |          |                 |       |  |   |
| 12 C12  | -45. 6368 | 13. 5705 | 13. 9438 C. ar  | 1 SUB |  |   |
| 0. 0000 |           |          |                 |       |  |   |
| 13 C13  | -46. 6481 | 12. 6073 | 13. 8393 C. ar  | 1 SUB |  | - |
| 0. 1150 |           |          |                 |       |  |   |
| 14 H13  | -46. 4569 | 11. 5673 | 14. 0892 H      | 1 SUB |  |   |
| 0. 1150 |           |          |                 |       |  |   |
| 15 C14  | -47. 9241 | 12. 9772 | 13. 4135 C. ar  | 1 SUB |  | - |
| 0. 1150 |           |          |                 |       |  |   |
| 16 C15  | -48. 1941 | 14. 3119 | 13. 1077 C. ar  | 1 SUB |  | - |
| 0. 1150 |           |          |                 |       |  |   |
| 17 C16  | -47. 1895 | 15. 2831 | 13. 1988 C. ar  | 1 SUB |  | - |
| 0. 1150 |           |          |                 |       |  |   |
| 18 C    | -47. 5177 | 16. 6964 | 12. 8847 C. 2   | 1 SUB |  |   |
| 0. 7000 |           |          |                 |       |  |   |
| 19 0    | -48. 6816 | 17. 0831 | 12. 8606 0. 2   | 1 SUB |  | - |
| 0. 4700 |           |          |                 |       |  |   |
| 20 C    | -46. 5036 | 17. 7238 | 12. 6335 C. ar  | 1 SUB |  | - |
| 0. 1150 |           |          |                 |       |  |   |
| 21 C17  | -45. 9126 | 14. 9030 | 13. 6007 C. ar  | 1 SUB |  | - |
| 0. 1150 |           |          |                 |       |  |   |
| 22 H17  | -45. 1108 | 15. 6359 | 13. 6663 H      | 1 SUB |  |   |
| 0. 1150 |           |          |                 |       |  |   |
| 23 C18  | -46. 2603 | 11. 5348 | 19. 0857 C. ar  | 1 SUB |  |   |
| 0. 2000 |           |          |                 |       |  |   |
| 24 C19  | -46. 7038 | 10. 7184 | 20. 1358 C. ar  | 1 SUB |  | - |
| 0. 1150 |           |          |                 |       |  |   |
| 25 C20  | -48. 0656 | 10. 4455 | 20. 3101 C. ar  | 1 SUB |  |   |
| 0. 0850 |           |          |                 |       |  |   |
| 26 C21  | -49. 0086 | 10. 9607 | 19. 4069 C. ar  | 1 SUB |  |   |
| 0. 0850 |           |          |                 |       |  |   |
| 27 C22  | -48. 5892 | 11. 8354 | 18. 3876 C. ar  | 1 SUB |  |   |
| 0. 0850 |           |          |                 |       |  |   |
| 28 C23  | -47. 2185 | 12. 0797 | 18. 2204 C. ar  | 1 SUB |  | - |

|         |     |           |          |          |      |       |   |
|---------|-----|-----------|----------|----------|------|-------|---|
| 0. 1150 |     |           |          |          |      |       |   |
| 29      | 024 | -50. 3240 | 10. 6026 | 19. 6321 | 0. 3 | 1 SUB | - |
| 0. 2850 |     |           |          |          |      |       |   |
| 30      | C25 | -51. 0685 | 10. 4319 | 18. 4219 | C. 3 | 1 SUB |   |
| 0. 1100 |     |           |          |          |      |       |   |
| 31      | 026 | -49. 5650 | 12. 4251 | 17. 6250 | 0. 3 | 1 SUB | - |
| 0. 2850 |     |           |          |          |      |       |   |
| 32      | C27 | -49. 1649 | 13. 4691 | 16. 7364 | C. 3 | 1 SUB |   |
| 0. 1100 |     |           |          |          |      |       |   |
| 33      | 028 | -48. 5223 | 9. 6071  | 21. 3038 | 0. 3 | 1 SUB | - |
| 0. 2850 |     |           |          |          |      |       |   |
| 34      | C29 | -47. 4629 | 8. 9141  | 21. 9722 | C. 3 | 1 SUB |   |
| 0. 1100 |     |           |          |          |      |       |   |
| 35      | H   | -49. 1968 | 14. 5974 | 12. 7985 | H    | 1 SUB |   |
| 0. 1150 |     |           |          |          |      |       |   |
| 36      | H31 | -40. 9453 | 12. 4617 | 17. 1119 | H    | 1 SUB |   |
| 0. 1150 |     |           |          |          |      |       |   |
| 37      | H32 | -44. 2988 | 11. 5572 | 19. 7336 | H    | 1 SUB |   |
| 0. 3800 |     |           |          |          |      |       |   |
| 38      | H33 | -40. 3027 | 14. 3250 | 14. 8831 | H    | 1 SUB |   |
| 0. 0600 |     |           |          |          |      |       |   |
| 39      | H34 | -40. 1425 | 12. 7021 | 14. 1830 | H    | 1 SUB |   |
| 0. 0600 |     |           |          |          |      |       |   |
| 40      | H35 | -40. 7167 | 14. 0582 | 13. 1861 | H    | 1 SUB |   |
| 0. 0600 |     |           |          |          |      |       |   |
| 41      | H37 | -48. 7154 | 12. 2305 | 13. 3400 | H    | 1 SUB |   |
| 0. 1150 |     |           |          |          |      |       |   |
| 42      | H40 | -45. 9669 | 10. 2611 | 20. 7889 | H    | 1 SUB |   |
| 0. 1150 |     |           |          |          |      |       |   |
| 43      | H41 | -46. 8764 | 12. 7314 | 17. 4227 | H    | 1 SUB |   |
| 0. 1150 |     |           |          |          |      |       |   |
| 44      | H42 | -51. 6102 | 11. 3485 | 18. 1739 | H    | 1 SUB |   |
| 0. 0300 |     |           |          |          |      |       |   |
| 45      | H43 | -51. 8126 | 9. 6486  | 18. 5924 | H    | 1 SUB |   |
| 0. 0300 |     |           |          |          |      |       |   |
| 46      | H44 | -50. 4322 | 10. 1140 | 17. 5944 | H    | 1 SUB |   |
| 0. 0300 |     |           |          |          |      |       |   |
| 47      | H45 | -50. 0687 | 13. 8873 | 16. 2844 | H    | 1 SUB |   |
| 0. 0300 |     |           |          |          |      |       |   |
| 48      | H46 | -48. 6552 | 14. 2738 | 17. 2754 | H    | 1 SUB |   |
| 0. 0300 |     |           |          |          |      |       |   |
| 49      | H47 | -48. 5414 | 13. 0784 | 15. 9295 | H    | 1 SUB |   |
| 0. 0300 |     |           |          |          |      |       |   |
| 50      | H48 | -47. 1496 | 8. 0399  | 21. 3933 | H    | 1 SUB |   |



|        |     |          |         |         |       |         |
|--------|-----|----------|---------|---------|-------|---------|
| 0.0300 |     |          |         |         |       |         |
| 51     | H49 | -46.6124 | 9.5728  | 22.1792 | H     | 1 SUB   |
| 0.0300 |     |          |         |         |       |         |
| 52     | H50 | -47.8546 | 8.5573  | 22.9294 | H     | 1 SUB   |
| 0.0300 |     |          |         |         |       |         |
| 53     | C   | -46.5473 | 18.9518 | 13.2936 | C. ar | 1 SUB - |
| 0.1150 |     |          |         |         |       |         |
| 54     | H   | -47.3868 | 19.2346 | 13.9120 | H     | 1 SUB   |
| 0.1150 |     |          |         |         |       |         |
| 55     | C   | -45.4807 | 19.8375 | 13.1577 | C. ar | 1 SUB - |
| 0.1150 |     |          |         |         |       |         |
| 56     | H   | -45.4957 | 20.7931 | 13.6774 | H     | 1 SUB   |
| 0.1150 |     |          |         |         |       |         |
| 57     | C   | -44.3949 | 19.5071 | 12.3490 | C. ar | 1 SUB - |
| 0.1150 |     |          |         |         |       |         |
| 58     | H   | -43.5776 | 20.2148 | 12.2373 | H     | 1 SUB   |
| 0.1150 |     |          |         |         |       |         |
| 59     | C   | -44.3642 | 18.2800 | 11.6892 | C. ar | 1 SUB - |
| 0.1150 |     |          |         |         |       |         |
| 60     | H   | -43.5224 | 18.0049 | 11.0645 | H     | 1 SUB   |
| 0.1150 |     |          |         |         |       |         |
| 61     | C   | -45.4148 | 17.3804 | 11.8343 | C. ar | 1 SUB - |
| 0.1150 |     |          |         |         |       |         |
| 62     | H   | -45.3737 | 16.4113 | 11.3423 | H     | 1 SUB   |

0.1150  
@<TRIPOS>BOND

|    |    |      |
|----|----|------|
| 1  | 1  | 2 ar |
| 2  | 1  | 6 ar |
| 3  | 2  | 3 ar |
| 4  | 2  | 10 l |
| 5  | 3  | 4 ar |
| 6  | 4  | 5 ar |
| 7  | 4  | 7 ar |
| 8  | 5  | 6 ar |
| 9  | 5  | 9 ar |
| 10 | 6  | 36 l |
| 11 | 7  | 8 ar |
| 12 | 7  | 12 l |
| 13 | 8  | 9 ar |
| 14 | 9  | 11 l |
| 15 | 10 | 23 l |
| 16 | 10 | 37 l |
| 17 | 11 | 38 l |
| 18 | 11 | 39 l |

|    |    |    |    |
|----|----|----|----|
| 19 | 11 | 40 | 1  |
| 20 | 12 | 13 | ar |
| 21 | 12 | 21 | ar |
| 22 | 13 | 14 | 1  |
| 23 | 13 | 15 | ar |
| 24 | 15 | 16 | ar |
| 25 | 15 | 41 | 1  |
| 26 | 16 | 17 | ar |
| 27 | 16 | 35 | 1  |
| 28 | 17 | 18 | 1  |
| 29 | 17 | 21 | ar |
| 30 | 18 | 19 | 2  |
| 31 | 18 | 20 | 1  |
| 32 | 20 | 53 | ar |
| 33 | 20 | 61 | ar |
| 34 | 21 | 22 | 1  |
| 35 | 23 | 24 | ar |
| 36 | 23 | 28 | ar |
| 37 | 24 | 25 | ar |
| 38 | 24 | 42 | 1  |
| 39 | 25 | 26 | ar |
| 40 | 25 | 33 | 1  |
| 41 | 26 | 27 | ar |
| 42 | 26 | 29 | 1  |
| 43 | 27 | 28 | ar |
| 44 | 27 | 31 | 1  |
| 45 | 28 | 43 | 1  |
| 46 | 29 | 30 | 1  |
| 47 | 30 | 44 | 1  |
| 48 | 30 | 45 | 1  |
| 49 | 30 | 46 | 1  |
| 50 | 31 | 32 | 1  |
| 51 | 32 | 47 | 1  |
| 52 | 32 | 48 | 1  |
| 53 | 32 | 49 | 1  |
| 54 | 33 | 34 | 1  |
| 55 | 34 | 50 | 1  |
| 56 | 34 | 51 | 1  |
| 57 | 34 | 52 | 1  |
| 58 | 53 | 54 | 1  |
| 59 | 53 | 55 | ar |
| 60 | 55 | 56 | 1  |
| 61 | 55 | 57 | ar |
| 62 | 57 | 58 | 1  |

63 57 59 ar  
64 59 60 1  
65 59 61 ar  
66 61 62 1

@<TRIPOS>SUBSTRUCTURE

1 SUB 1 GROUP 0 \*\*\*\* 0 ROOT

**(17) Ligand17.mol2**

@<TRIPOS>MOLECULE

P15H

61 65 1

SMALL

USER\_CHARGES

@<TRIPOS>ATOM

|        |     |          |         |         |        |   |     |   |
|--------|-----|----------|---------|---------|--------|---|-----|---|
| 1      | N1  | -42.7521 | 11.9465 | 17.9671 | N. 2   | 1 | SUB | - |
| 0.5000 |     |          |         |         |        |   |     |   |
| 2      | C2  | -44.1304 | 12.0450 | 17.8573 | C. ar  | 1 | SUB |   |
| 0.7000 |     |          |         |         |        |   |     |   |
| 3      | N3  | -44.7525 | 12.4307 | 16.7768 | N. 2   | 1 | SUB | - |
| 0.2500 |     |          |         |         |        |   |     |   |
| 4      | N4  | -43.9693 | 12.7751 | 15.7328 | N. p13 | 1 | SUB |   |
| 0.0490 |     |          |         |         |        |   |     |   |
| 5      | C5  | -42.6175 | 12.7029 | 15.7663 | C. ar  | 1 | SUB |   |
| 0.1413 |     |          |         |         |        |   |     |   |
| 6      | C6  | -42.0143 | 12.2784 | 16.9590 | C. ar  | 1 | SUB | - |
| 0.1053 |     |          |         |         |        |   |     |   |
| 7      | C7  | -44.3172 | 13.2733 | 14.4863 | C. ar  | 1 | SUB |   |
| 0.3530 |     |          |         |         |        |   |     |   |
| 8      | N8  | -43.2244 | 13.4403 | 13.7484 | N. 2   | 1 | SUB | - |
| 0.5630 |     |          |         |         |        |   |     |   |
| 9      | C9  | -42.1593 | 13.1355 | 14.5527 | C. ar  | 1 | SUB |   |
| 0.1319 |     |          |         |         |        |   |     |   |
| 10     | N10 | -44.8017 | 11.6678 | 18.9945 | N. p13 | 1 | SUB | - |
| 0.7800 |     |          |         |         |        |   |     |   |
| 11     | C11 | -40.7727 | 13.3307 | 14.0936 | C. 3   | 1 | SUB | - |
| 0.0519 |     |          |         |         |        |   |     |   |
| 12     | C12 | -45.6538 | 13.7035 | 14.0656 | C. ar  | 1 | SUB |   |
| 0.0000 |     |          |         |         |        |   |     |   |
| 13     | C13 | -46.7002 | 12.8187 | 13.7814 | C. ar  | 1 | SUB | - |
| 0.1150 |     |          |         |         |        |   |     |   |
| 14     | H13 | -46.5496 | 11.7443 | 13.8412 | H      | 1 | SUB |   |
| 0.1150 |     |          |         |         |        |   |     |   |
| 15     | C14 | -47.9598 | 13.3043 | 13.4171 | C. ar  | 1 | SUB | - |

|         |           |          |          |       |       |   |  |
|---------|-----------|----------|----------|-------|-------|---|--|
| 0. 1150 |           |          |          |       |       |   |  |
| 16 C15  | -48. 1799 | 14. 6793 | 13. 3441 | C. ar | 1 SUB | - |  |
| 0. 1150 |           |          |          |       |       |   |  |
| 17 C16  | -47. 1453 | 15. 5760 | 13. 6128 | C. ar | 1 SUB |   |  |
| 0. 0850 |           |          |          |       |       |   |  |
| 18 0    | -47. 4324 | 16. 9113 | 13. 4352 | 0. 3  | 1 SUB | - |  |
| 0. 1700 |           |          |          |       |       |   |  |
| 19 C    | -46. 3989 | 17. 7687 | 13. 1446 | C. ar | 1 SUB |   |  |
| 0. 0850 |           |          |          |       |       |   |  |
| 20 C17  | -45. 8860 | 15. 0862 | 13. 9522 | C. ar | 1 SUB | - |  |
| 0. 1150 |           |          |          |       |       |   |  |
| 21 H17  | -45. 0623 | 15. 7742 | 14. 1331 | H     | 1 SUB |   |  |
| 0. 1150 |           |          |          |       |       |   |  |
| 22 C18  | -46. 1580 | 11. 3512 | 19. 1708 | C. ar | 1 SUB |   |  |
| 0. 2000 |           |          |          |       |       |   |  |
| 23 C19  | -47. 0943 | 11. 8360 | 18. 2462 | C. ar | 1 SUB | - |  |
| 0. 1150 |           |          |          |       |       |   |  |
| 24 C20  | -48. 4662 | 11. 6213 | 18. 4303 | C. ar | 1 SUB |   |  |
| 0. 0850 |           |          |          |       |       |   |  |
| 25 C21  | -48. 9266 | 10. 9415 | 19. 5699 | C. ar | 1 SUB |   |  |
| 0. 0850 |           |          |          |       |       |   |  |
| 26 C22  | -47. 9970 | 10. 3820 | 20. 4653 | C. ar | 1 SUB |   |  |
| 0. 0850 |           |          |          |       |       |   |  |
| 27 C23  | -46. 6307 | 10. 6257 | 20. 2709 | C. ar | 1 SUB | - |  |
| 0. 1150 |           |          |          |       |       |   |  |
| 28 024  | -50. 2966 | 10. 8205 | 19. 6969 | 0. 3  | 1 SUB | - |  |
| 0. 2850 |           |          |          |       |       |   |  |
| 29 C25  | -50. 9185 | 10. 2971 | 18. 5182 | C. 3  | 1 SUB |   |  |
| 0. 1100 |           |          |          |       |       |   |  |
| 30 026  | -48. 4836 | 9. 6035  | 21. 4846 | 0. 3  | 1 SUB | - |  |
| 0. 2850 |           |          |          |       |       |   |  |
| 31 C27  | -47. 5517 | 8. 7497  | 22. 1483 | C. 3  | 1 SUB |   |  |
| 0. 1100 |           |          |          |       |       |   |  |
| 32 028  | -49. 4106 | 12. 1337 | 17. 5675 | 0. 3  | 1 SUB | - |  |
| 0. 2850 |           |          |          |       |       |   |  |
| 33 C29  | -48. 9787 | 13. 3378 | 16. 9231 | C. 3  | 1 SUB |   |  |
| 0. 1100 |           |          |          |       |       |   |  |
| 34 H    | -49. 1604 | 15. 0560 | 13. 0702 | H     | 1 SUB |   |  |
| 0. 1150 |           |          |          |       |       |   |  |
| 35 H31  | -40. 9160 | 12. 2267 | 17. 0287 | H     | 1 SUB |   |  |
| 0. 1150 |           |          |          |       |       |   |  |
| 36 H32  | -44. 2162 | 11. 6247 | 19. 8273 | H     | 1 SUB |   |  |
| 0. 3800 |           |          |          |       |       |   |  |
| 37 H33  | -40. 2230 | 13. 9667 | 14. 7952 | H     | 1 SUB |   |  |

|        |        |          |         |               |       |   |
|--------|--------|----------|---------|---------------|-------|---|
| 0.0600 |        |          |         |               |       |   |
|        | 38 H34 | -40.2588 | 12.3684 | 14.0240 H     | 1 SUB |   |
| 0.0600 |        |          |         |               |       |   |
|        | 39 H35 | -40.7515 | 13.8164 | 13.1129 H     | 1 SUB |   |
| 0.0600 |        |          |         |               |       |   |
|        | 40 H37 | -48.7697 | 12.6130 | 13.1986 H     | 1 SUB |   |
| 0.1150 |        |          |         |               |       |   |
|        | 41 H40 | -46.7412 | 12.4271 | 17.4070 H     | 1 SUB |   |
| 0.1150 |        |          |         |               |       |   |
|        | 42 H41 | -45.9035 | 10.2263 | 20.9700 H     | 1 SUB |   |
| 0.1150 |        |          |         |               |       |   |
|        | 43 H42 | -51.2787 | 11.1105 | 17.8825 H     | 1 SUB |   |
| 0.0300 |        |          |         |               |       |   |
|        | 44 H43 | -51.7907 | 9.7151  | 18.8293 H     | 1 SUB |   |
| 0.0300 |        |          |         |               |       |   |
|        | 45 H44 | -50.2507 | 9.6323  | 17.9675 H     | 1 SUB |   |
| 0.0300 |        |          |         |               |       |   |
|        | 46 H45 | -48.1118 | 8.1143  | 22.8401 H     | 1 SUB |   |
| 0.0300 |        |          |         |               |       |   |
|        | 47 H46 | -47.0307 | 8.1029  | 21.4347 H     | 1 SUB |   |
| 0.0300 |        |          |         |               |       |   |
|        | 48 H47 | -46.8408 | 9.3286  | 22.7393 H     | 1 SUB |   |
| 0.0300 |        |          |         |               |       |   |
|        | 49 H48 | -49.1263 | 14.1999 | 17.5811 H     | 1 SUB |   |
| 0.0300 |        |          |         |               |       |   |
|        | 50 H49 | -47.9364 | 13.2705 | 16.5914 H     | 1 SUB |   |
| 0.0300 |        |          |         |               |       |   |
|        | 51 H50 | -49.6058 | 13.4818 | 16.0380 H     | 1 SUB |   |
| 0.0300 |        |          |         |               |       |   |
|        | 52 C   | -45.3621 | 17.3093 | 12.3284 C. ar | 1 SUB | - |
| 0.1150 |        |          |         |               |       |   |
|        | 53 H   | -45.3150 | 16.2699 | 12.0146 H     | 1 SUB |   |
| 0.1150 |        |          |         |               |       |   |
|        | 54 C   | -44.3474 | 18.1786 | 11.9297 C. ar | 1 SUB | - |
| 0.1150 |        |          |         |               |       |   |
|        | 55 H   | -43.5391 | 17.8122 | 11.2965 H     | 1 SUB |   |
| 0.1150 |        |          |         |               |       |   |
|        | 56 C   | -44.3595 | 19.5052 | 12.3587 C. ar | 1 SUB | - |
| 0.1150 |        |          |         |               |       |   |
|        | 57 H   | -43.5526 | 20.1716 | 12.0643 H     | 1 SUB |   |
| 0.1150 |        |          |         |               |       |   |
|        | 58 C   | -45.4014 | 19.9634 | 13.1675 C. ar | 1 SUB | - |
| 0.1150 |        |          |         |               |       |   |
|        | 59 H   | -45.4139 | 20.9943 | 13.5069 H     | 1 SUB |   |

0.1150  
60 C -46.4285 19.1009 13.5587 C. ar 1 SUB -

0.1150  
61 H -47.2404 19.4712 14.1826 H 1 SUB

0.1150  
@<TRIPOS>BOND

1 1 2 ar  
2 1 6 ar  
3 2 3 ar  
4 2 10 1  
5 3 4 ar  
6 4 5 ar  
7 4 7 ar  
8 5 6 ar  
9 5 9 ar  
10 6 35 1  
11 7 8 ar  
12 7 12 1  
13 8 9 ar  
14 9 11 1  
15 10 22 1  
16 10 36 1  
17 11 37 1  
18 11 38 1  
19 11 39 1  
20 12 13 ar  
21 12 20 ar  
22 13 14 1  
23 13 15 ar  
24 15 16 ar  
25 15 40 1  
26 16 17 ar  
27 16 34 1  
28 17 18 1  
29 17 20 ar  
30 18 19 1  
31 19 52 ar  
32 19 60 ar  
33 20 21 1  
34 22 23 ar  
35 22 27 ar  
36 23 24 ar  
37 23 41 1  
38 24 25 ar

```

39  24  32  1
40  25  26  ar
41  25  28  1
42  26  27  ar
43  26  30  1
44  27  42  1
45  28  29  1
46  29  43  1
47  29  44  1
48  29  45  1
49  30  31  1
50  31  46  1
51  31  47  1
52  31  48  1
53  32  33  1
54  33  49  1
55  33  50  1
56  33  51  1
57  52  53  1
58  52  54  ar
59  54  55  1
60  54  56  ar
61  56  57  1
62  56  58  ar
63  58  59  1
64  58  60  ar
65  60  61  1

```

@<TRIPOS>SUBSTRUCTURE

```

1 SUB          1 GROUP          0      ****      0 ROOT

```

**(18) Ligand18.mol2**

@<TRIPOS>MOLECULE

P15i

```

50  53  1

```

SMALL

USER\_CHARGES

@<TRIPOS>ATOM

```

1 N1          -42.6346   12.1407   17.9664 N.2      1 SUB      -
0.5000
2 C2          -43.9721   12.1405   17.7047 C.ar      1 SUB
0.7000
3 N3          -44.5848   12.5537   16.5614 N.2      1 SUB      -
0.2500

```

|        |        |          |         |                |       |   |
|--------|--------|----------|---------|----------------|-------|---|
| 0.0490 | 4 N4   | -43.7242 | 13.0440 | 15.6703 N. p13 | 1 SUB |   |
| 0.1413 | 5 C5   | -42.3625 | 13.1178 | 15.8208 C. ar  | 1 SUB |   |
| 0.1053 | 6 C6   | -41.8009 | 12.6270 | 17.0138 C. ar  | 1 SUB | - |
| 0.3530 | 7 C7   | -44.0549 | 13.6292 | 14.4790 C. ar  | 1 SUB |   |
| 0.5630 | 8 N8   | -42.9151 | 14.0492 | 13.8893 N. 2   | 1 SUB | - |
| 0.1319 | 9 C9   | -41.8286 | 13.7351 | 14.7239 C. ar  | 1 SUB |   |
| 0.7800 | 10 N10 | -44.7472 | 11.6640 | 18.7674 N. p13 | 1 SUB | - |
| 0.0519 | 11 C11 | -40.4265 | 14.1110 | 14.3756 C. 3   | 1 SUB | - |
| 0.0000 | 12 C12 | -45.4084 | 13.8463 | 13.9961 C. ar  | 1 SUB |   |
| 0.1150 | 13 C13 | -46.2992 | 12.7608 | 13.8658 C. ar  | 1 SUB | - |
| 0.1150 | 14 C14 | -47.6457 | 12.9928 | 13.5322 C. ar  | 1 SUB | - |
| 0.2200 | 15 C15 | -48.1122 | 14.3126 | 13.3650 C. ar  | 1 SUB |   |
| 0.1150 | 16 C16 | -47.2153 | 15.3935 | 13.4525 C. ar  | 1 SUB | - |
| 0.1150 | 17 C17 | -45.8609 | 15.1606 | 13.7585 C. ar  | 1 SUB | - |
| 0.2000 | 18 C18 | -46.1287 | 11.4522 | 18.8930 C. ar  | 1 SUB |   |
| 0.1150 | 19 C19 | -46.5331 | 10.5431 | 19.8884 C. ar  | 1 SUB | - |
| 0.0850 | 20 C20 | -47.9024 | 10.2798 | 20.1294 C. ar  | 1 SUB |   |
| 0.0850 | 21 C21 | -48.8735 | 10.9361 | 19.3415 C. ar  | 1 SUB |   |
| 0.0850 | 22 C22 | -48.4921 | 11.8879 | 18.3674 C. ar  | 1 SUB |   |
| 0.1150 | 23 C23 | -47.1145 | 12.1353 | 18.1459 C. ar  | 1 SUB | - |
| 0.2850 | 24 O24 | -50.1991 | 10.6613 | 19.5661 O. 3   | 1 SUB | - |
| 0.1100 | 25 C25 | -50.8378 | 9.9803  | 18.4925 C. 3   | 1 SUB |   |



|        |          |         |         |     |       |   |
|--------|----------|---------|---------|-----|-------|---|
| 26 026 | -49.5040 | 12.5743 | 17.7312 | 0.3 | 1 SUB | - |
| 0.2850 |          |         |         |     |       |   |
| 27 C27 | -49.1548 | 13.5302 | 16.7451 | C.3 | 1 SUB |   |
| 0.1100 |          |         |         |     |       |   |
| 28 028 | -48.3502 | 9.4103  | 21.1044 | 0.3 | 1 SUB | - |
| 0.2850 |          |         |         |     |       |   |
| 29 C29 | -47.3784 | 8.7859  | 21.9356 | C.3 | 1 SUB |   |
| 0.1100 |          |         |         |     |       |   |
| 30 F30 | -49.4309 | 14.5408 | 13.1678 | F   | 1 SUB | - |
| 0.2200 |          |         |         |     |       |   |
| 31 H31 | -40.7363 | 12.6542 | 17.2025 | H   | 1 SUB |   |
| 0.1150 |          |         |         |     |       |   |
| 32 H32 | -44.2132 | 11.4379 | 19.5974 | H   | 1 SUB |   |
| 0.3800 |          |         |         |     |       |   |
| 33 H33 | -40.0870 | 14.9530 | 14.9793 | H   | 1 SUB |   |
| 0.0600 |          |         |         |     |       |   |
| 34 H34 | -39.7422 | 13.2806 | 14.5490 | H   | 1 SUB |   |
| 0.0600 |          |         |         |     |       |   |
| 35 H35 | -40.3515 | 14.4015 | 13.3267 | H   | 1 SUB |   |
| 0.0600 |          |         |         |     |       |   |
| 36 H36 | -45.9573 | 11.7519 | 14.0500 | H   | 1 SUB |   |
| 0.1150 |          |         |         |     |       |   |
| 37 H37 | -48.3351 | 12.1640 | 13.4557 | H   | 1 SUB |   |
| 0.1150 |          |         |         |     |       |   |
| 38 H38 | -47.5752 | 16.4009 | 13.3147 | H   | 1 SUB |   |
| 0.1150 |          |         |         |     |       |   |
| 39 H39 | -45.1820 | 15.9948 | 13.8656 | H   | 1 SUB |   |
| 0.1150 |          |         |         |     |       |   |
| 40 H40 | -45.7637 | 10.0523 | 20.4635 | H   | 1 SUB |   |
| 0.1150 |          |         |         |     |       |   |
| 41 H41 | -46.8194 | 12.8866 | 17.4334 | H   | 1 SUB |   |
| 0.1150 |          |         |         |     |       |   |
| 42 H42 | -50.8572 | 10.5587 | 17.5698 | H   | 1 SUB |   |
| 0.0300 |          |         |         |     |       |   |
| 43 H43 | -51.8717 | 9.7696  | 18.7637 | H   | 1 SUB |   |
| 0.0300 |          |         |         |     |       |   |
| 44 H44 | -50.3494 | 9.0268  | 18.2881 | H   | 1 SUB |   |
| 0.0300 |          |         |         |     |       |   |
| 45 H45 | -50.0607 | 13.9196 | 16.2807 | H   | 1 SUB |   |
| 0.0300 |          |         |         |     |       |   |
| 46 H46 | -48.6066 | 14.3701 | 17.1739 | H   | 1 SUB |   |
| 0.0300 |          |         |         |     |       |   |
| 47 H47 | -48.5573 | 13.0656 | 15.9662 | H   | 1 SUB |   |
| 0.0300 |          |         |         |     |       |   |

|        |          |        |           |       |
|--------|----------|--------|-----------|-------|
| 48 H48 | -46.7368 | 8.1166 | 21.3605 H | 1 SUB |
| 0.0300 |          |        |           |       |
| 49 H49 | -46.7629 | 9.5215 | 22.4546 H | 1 SUB |
| 0.0300 |          |        |           |       |
| 50 H50 | -47.8815 | 8.1901 | 22.6962 H | 1 SUB |
| 0.0300 |          |        |           |       |

@<TRIPOS>BOND

|    |    |       |
|----|----|-------|
| 1  | 1  | 2 ar  |
| 2  | 1  | 6 ar  |
| 3  | 2  | 3 ar  |
| 4  | 2  | 10 1  |
| 5  | 3  | 4 ar  |
| 6  | 4  | 5 ar  |
| 7  | 4  | 7 ar  |
| 8  | 5  | 6 ar  |
| 9  | 5  | 9 ar  |
| 10 | 6  | 31 1  |
| 11 | 7  | 8 ar  |
| 12 | 7  | 12 1  |
| 13 | 8  | 9 ar  |
| 14 | 9  | 11 1  |
| 15 | 10 | 18 1  |
| 16 | 10 | 32 1  |
| 17 | 11 | 33 1  |
| 18 | 11 | 34 1  |
| 19 | 11 | 35 1  |
| 20 | 12 | 13 ar |
| 21 | 12 | 17 ar |
| 22 | 13 | 14 ar |
| 23 | 13 | 36 1  |
| 24 | 14 | 15 ar |
| 25 | 14 | 37 1  |
| 26 | 15 | 16 ar |
| 27 | 15 | 30 1  |
| 28 | 16 | 17 ar |
| 29 | 16 | 38 1  |
| 30 | 17 | 39 1  |
| 31 | 18 | 19 ar |
| 32 | 18 | 23 ar |
| 33 | 19 | 20 ar |
| 34 | 19 | 40 1  |
| 35 | 20 | 21 ar |
| 36 | 20 | 28 1  |
| 37 | 21 | 22 ar |

```

38  21  24  1
39  22  23  ar
40  22  26  1
41  23  41  1
42  24  25  1
43  25  42  1
44  25  43  1
45  25  44  1
46  26  27  1
47  27  45  1
48  27  46  1
49  27  47  1
50  28  29  1
51  29  48  1
52  29  49  1
53  29  50  1

```

@<TRIPOS>SUBSTRUCTURE

```

1 SUB          1 GROUP          0      ****  0 ROOT

```

**(19) Ligand19.mol2**

@<TRIPOS>MOLECULE

P2

```

41  44  1

```

SMALL

USER\_CHARGES

@<TRIPOS>ATOM

```

1 N1          -42.6266   12.1417   17.9674 N. 2      1 SUB      -
0.5000
2 C2          -43.9519   12.1568   17.6573 C. ar     1 SUB
0.7000
3 N3          -44.4982   12.4583   16.4503 N. 2      1 SUB      -
0.2500
4 N4          -43.5980   12.8762   15.5631 N. p13    1 SUB
0.0490
5 C5          -42.2470   12.9637   15.7781 C. ar     1 SUB
0.1413
6 C6          -41.7434   12.5490   17.0233 C. ar     1 SUB      -
0.1053
7 C7          -43.8716   13.3909   14.3221 C. ar     1 SUB
0.3530
8 N8          -42.6971   13.7906   13.7789 N. 2      1 SUB      -
0.5630
9 C9          -41.6587   13.5413   14.6916 C. ar     1 SUB

```

|         |          |         |                |       |   |  |
|---------|----------|---------|----------------|-------|---|--|
| 0.1319  |          |         |                |       |   |  |
| 10 N10  | -44.8175 | 11.9182 | 18.7347 N. p13 | 1 SUB | - |  |
| 0.7800  |          |         |                |       |   |  |
| 11 C11  | -40.2448 | 13.9527 | 14.4450 C. 3   | 1 SUB | - |  |
| 0.0519  |          |         |                |       |   |  |
| 12 C12  | -45.1979 | 13.5830 | 13.7355 C. ar  | 1 SUB |   |  |
| 0.0000  |          |         |                |       |   |  |
| 13 C13  | -46.2528 | 12.6817 | 14.0109 C. ar  | 1 SUB | - |  |
| 0.1150  |          |         |                |       |   |  |
| 14 C14  | -47.5521 | 12.9406 | 13.5464 C. ar  | 1 SUB | - |  |
| 0.1150  |          |         |                |       |   |  |
| 15 C15  | -47.8011 | 14.0825 | 12.7684 C. ar  | 1 SUB | - |  |
| 0.1150  |          |         |                |       |   |  |
| 16 C16  | -46.7544 | 14.9728 | 12.4613 C. ar  | 1 SUB | - |  |
| 0.1150  |          |         |                |       |   |  |
| 17 C17  | -45.4562 | 14.7263 | 12.9477 C. ar  | 1 SUB | - |  |
| 0.1150  |          |         |                |       |   |  |
| 18 C18  | -46.2701 | 11.8274 | 18.5722 C. 3   | 1 SUB |   |  |
| 0.1950  |          |         |                |       |   |  |
| 19 C    | -47.0140 | 13.0194 | 17.9666 C. ar  | 1 SUB | - |  |
| 0.1150  |          |         |                |       |   |  |
| 20 H183 | -46.4833 | 10.9460 | 17.9679 H      | 1 SUB |   |  |
| 0.0600  |          |         |                |       |   |  |
| 21 H182 | -46.7016 | 11.6320 | 19.5537 H      | 1 SUB |   |  |
| 0.0600  |          |         |                |       |   |  |
| 22 H28  | -40.6909 | 12.5932 | 17.2608 H      | 1 SUB |   |  |
| 0.1150  |          |         |                |       |   |  |
| 23 H29  | -44.4231 | 11.8352 | 19.6672 H      | 1 SUB |   |  |
| 0.3800  |          |         |                |       |   |  |
| 24 H30  | -39.8718 | 14.5623 | 15.2682 H      | 1 SUB |   |  |
| 0.0600  |          |         |                |       |   |  |
| 25 H31  | -39.5971 | 13.0798 | 14.3687 H      | 1 SUB |   |  |
| 0.0600  |          |         |                |       |   |  |
| 26 H32  | -40.1497 | 14.5418 | 13.5321 H      | 1 SUB |   |  |
| 0.0600  |          |         |                |       |   |  |
| 27 H33  | -46.0840 | 11.7879 | 14.5927 H      | 1 SUB |   |  |
| 0.1150  |          |         |                |       |   |  |
| 28 H34  | -48.3511 | 12.2518 | 13.7718 H      | 1 SUB |   |  |
| 0.1150  |          |         |                |       |   |  |
| 29 H35  | -48.7955 | 14.2693 | 12.3938 H      | 1 SUB |   |  |
| 0.1150  |          |         |                |       |   |  |
| 30 H36  | -46.9539 | 15.8496 | 11.8622 H      | 1 SUB |   |  |
| 0.1150  |          |         |                |       |   |  |
| 31 H37  | -44.6631 | 15.4290 | 12.7343 H      | 1 SUB |   |  |

|        |   |          |         |         |       |         |
|--------|---|----------|---------|---------|-------|---------|
| 0.1150 |   |          |         |         |       |         |
| 32     | C | -46.4721 | 14.3262 | 17.9675 | C. ar | 1 SUB - |
| 0.1150 |   |          |         |         |       |         |
| 33     | H | -45.4913 | 14.5146 | 18.3772 | H     | 1 SUB   |
| 0.1150 |   |          |         |         |       |         |
| 34     | C | -47.1866 | 15.3971 | 17.3971 | C. ar | 1 SUB - |
| 0.1150 |   |          |         |         |       |         |
| 35     | H | -46.7608 | 16.3907 | 17.3916 | H     | 1 SUB   |
| 0.1150 |   |          |         |         |       |         |
| 36     | C | -48.4455 | 15.1701 | 16.8094 | C. ar | 1 SUB - |
| 0.1150 |   |          |         |         |       |         |
| 37     | H | -48.9825 | 15.9887 | 16.3521 | H     | 1 SUB   |
| 0.1150 |   |          |         |         |       |         |
| 38     | C | -48.9920 | 13.8723 | 16.8047 | C. ar | 1 SUB - |
| 0.1150 |   |          |         |         |       |         |
| 39     | H | -49.9515 | 13.6877 | 16.3450 | H     | 1 SUB   |
| 0.1150 |   |          |         |         |       |         |
| 40     | C | -48.2825 | 12.8057 | 17.3873 | C. ar | 1 SUB - |
| 0.1150 |   |          |         |         |       |         |
| 41     | H | -48.7092 | 11.8136 | 17.3705 | H     | 1 SUB   |

0.1150  
@<TRIPOS>BOND

|    |    |       |
|----|----|-------|
| 1  | 1  | 2 ar  |
| 2  | 1  | 6 ar  |
| 3  | 2  | 3 ar  |
| 4  | 2  | 10 1  |
| 5  | 3  | 4 ar  |
| 6  | 4  | 5 ar  |
| 7  | 4  | 7 ar  |
| 8  | 5  | 6 ar  |
| 9  | 5  | 9 ar  |
| 10 | 6  | 22 1  |
| 11 | 7  | 8 ar  |
| 12 | 7  | 12 1  |
| 13 | 8  | 9 ar  |
| 14 | 9  | 11 1  |
| 15 | 10 | 18 1  |
| 16 | 10 | 23 1  |
| 17 | 11 | 24 1  |
| 18 | 11 | 25 1  |
| 19 | 11 | 26 1  |
| 20 | 12 | 13 ar |
| 21 | 12 | 17 ar |
| 22 | 13 | 14 ar |

23 13 27 1  
 24 14 15 ar  
 25 14 28 1  
 26 15 16 ar  
 27 15 29 1  
 28 16 17 ar  
 29 16 30 1  
 30 17 31 1  
 31 18 19 1  
 32 18 20 1  
 33 18 21 1  
 34 19 32 ar  
 35 19 40 ar  
 36 32 33 1  
 37 32 34 ar  
 38 34 35 1  
 39 34 36 ar  
 40 36 37 1  
 41 36 38 ar  
 42 38 39 1  
 43 38 40 ar  
 44 40 41 1

@<TRIPOS>SUBSTRUCTURE

1 SUB 1 GROUP 0 \*\*\*\* 0 ROOT

**(20) Ligand20.mol2**

@<TRIPOS>MOLECULE

P11

28 30 1

SMALL

USER\_CHARGES

@<TRIPOS>ATOM

|        |          |         |                |       |   |
|--------|----------|---------|----------------|-------|---|
| 1 N1   | -43.1531 | 11.9965 | 18.4696 N. 2   | 1 SUB | - |
| 0.5000 |          |         |                |       |   |
| 2 C2   | -44.4669 | 12.1591 | 18.0579 C. ar  | 1 SUB |   |
| 0.6800 |          |         |                |       |   |
| 3 N3   | -44.8193 | 12.4218 | 16.8328 N. 2   | 1 SUB | - |
| 0.2500 |          |         |                |       |   |
| 4 N4   | -43.8166 | 12.5970 | 15.9498 N. p13 | 1 SUB |   |
| 0.0490 |          |         |                |       |   |
| 5 C5   | -42.5095 | 12.4851 | 16.2814 C. ar  | 1 SUB |   |
| 0.1413 |          |         |                |       |   |
| 6 C6   | -42.1984 | 12.1685 | 17.6134 C. ar  | 1 SUB | - |

|         |           |          |                 |       |  |   |
|---------|-----------|----------|-----------------|-------|--|---|
| 0. 1053 |           |          |                 |       |  |   |
| 7 C7    | -43. 8752 | 12. 9329 | 14. 6061 C. ar  | 1 SUB |  |   |
| 0. 3530 |           |          |                 |       |  |   |
| 8 N8    | -42. 6453 | 13. 0171 | 14. 1103 N. 2   | 1 SUB |  | - |
| 0. 5630 |           |          |                 |       |  |   |
| 9 C9    | -41. 7883 | 12. 7742 | 15. 1552 C. ar  | 1 SUB |  |   |
| 0. 1319 |           |          |                 |       |  |   |
| 10 N10  | -45. 3844 | 11. 9913 | 19. 0613 N. p13 | 1 SUB |  | - |
| 0. 9000 |           |          |                 |       |  |   |
| 11 C11  | -40. 3287 | 12. 8844 | 14. 9875 C. 3   | 1 SUB |  | - |
| 0. 0519 |           |          |                 |       |  |   |
| 12 C12  | -45. 1024 | 13. 2594 | 13. 8721 C. ar  | 1 SUB |  |   |
| 0. 0000 |           |          |                 |       |  |   |
| 13 C13  | -46. 3014 | 12. 5599 | 14. 0628 C. ar  | 1 SUB |  | - |
| 0. 1150 |           |          |                 |       |  |   |
| 14 C14  | -47. 4659 | 12. 9412 | 13. 3930 C. ar  | 1 SUB |  | - |
| 0. 1150 |           |          |                 |       |  |   |
| 15 C15  | -47. 4421 | 14. 0191 | 12. 5135 C. ar  | 1 SUB |  | - |
| 0. 1150 |           |          |                 |       |  |   |
| 16 C16  | -46. 2536 | 14. 7107 | 12. 2958 C. ar  | 1 SUB |  | - |
| 0. 1150 |           |          |                 |       |  |   |
| 17 C17  | -45. 0889 | 14. 3277 | 12. 9632 C. ar  | 1 SUB |  | - |
| 0. 1150 |           |          |                 |       |  |   |
| 18 H26  | -41. 1465 | 12. 0629 | 17. 9194 H      | 1 SUB |  |   |
| 0. 1150 |           |          |                 |       |  |   |
| 19 H27  | -44. 9646 | 11. 7907 | 19. 9676 H      | 1 SUB |  |   |
| 0. 3600 |           |          |                 |       |  |   |
| 20 H101 | -46. 3816 | 12. 0599 | 18. 9164 H      | 1 SUB |  |   |
| 0. 3600 |           |          |                 |       |  |   |
| 21 H28  | -39. 9188 | 13. 6248 | 15. 6809 H      | 1 SUB |  |   |
| 0. 0600 |           |          |                 |       |  |   |
| 22 H29  | -39. 8493 | 11. 9227 | 15. 1879 H      | 1 SUB |  |   |
| 0. 0600 |           |          |                 |       |  |   |
| 23 H30  | -40. 0749 | 13. 2007 | 13. 9715 H      | 1 SUB |  |   |
| 0. 0600 |           |          |                 |       |  |   |
| 24 H31  | -46. 3448 | 11. 7152 | 14. 7436 H      | 1 SUB |  |   |
| 0. 1150 |           |          |                 |       |  |   |
| 25 H32  | -48. 3936 | 12. 4064 | 13. 5722 H      | 1 SUB |  |   |
| 0. 1150 |           |          |                 |       |  |   |
| 26 H33  | -48. 3473 | 14. 3301 | 11. 9997 H      | 1 SUB |  |   |
| 0. 1150 |           |          |                 |       |  |   |
| 27 H34  | -46. 2366 | 15. 5569 | 11. 6155 H      | 1 SUB |  |   |
| 0. 1150 |           |          |                 |       |  |   |
| 28 H35  | -44. 1678 | 14. 8817 | 12. 7877 H      | 1 SUB |  |   |

0.1150

@<TRIPOS>BOND

|    |    |    |    |
|----|----|----|----|
| 1  | 1  | 2  | ar |
| 2  | 1  | 6  | ar |
| 3  | 2  | 3  | ar |
| 4  | 2  | 10 | 1  |
| 5  | 3  | 4  | ar |
| 6  | 4  | 5  | ar |
| 7  | 4  | 7  | ar |
| 8  | 5  | 6  | ar |
| 9  | 5  | 9  | ar |
| 10 | 6  | 18 | 1  |
| 11 | 7  | 8  | ar |
| 12 | 7  | 12 | 1  |
| 13 | 8  | 9  | ar |
| 14 | 9  | 11 | 1  |
| 15 | 10 | 19 | 1  |
| 16 | 10 | 20 | 1  |
| 17 | 11 | 21 | 1  |
| 18 | 11 | 22 | 1  |
| 19 | 11 | 23 | 1  |
| 20 | 12 | 13 | ar |
| 21 | 12 | 17 | ar |
| 22 | 13 | 14 | ar |
| 23 | 13 | 24 | 1  |
| 24 | 14 | 15 | ar |
| 25 | 14 | 25 | 1  |
| 26 | 15 | 16 | ar |
| 27 | 15 | 26 | 1  |
| 28 | 16 | 17 | ar |
| 29 | 16 | 27 | 1  |
| 30 | 17 | 28 | 1  |

@<TRIPOS>SUBSTRUCTURE

1 SUB 1 GROUP 0 \*\*\*\* 0 ROOT

**(21) Protein.pdb**

REMARK Accelrys Discovery Studio PDB file

REMARK Created: Wed Jun 22 14:16:30 中国标准时间 2016

CRYST1 66.593 66.593 154.110 90.00 90.00 120.00 P3221

ATOM 1 N ALA A 37 -54.071 2.229 -5.927 1.00 45.42

N1+

ATOM 2 CA ALA A 37 -54.286 2.976 -4.649 1.00 45.50

C

ATOM 3 C ALA A 37 -53.007 3.130 -3.816 1.00 45.46

C





















































































































































































































































TER 2380 SER A 330  
END
